1  
2  
3  
4  
5  
6  
7  
8  
9  
10  
11  
12  
13  
14  
15  
16  
17  
18  
19  
20  
21  
22  
23  
24  
25  
26  
27  
28  
29  
30  
31  
32

Title: Using synchronized brain rhythms to bias memory-guided decisions

Authors: J. J. Stout<sup>1</sup>, A. E. George<sup>2</sup>, S. Kim<sup>1</sup>, H. L. Hallock<sup>3</sup>, A. L. Griffin<sup>1,4,\*</sup>

<sup>1</sup>Department of Psychological and Brain Sciences, University of Delaware, Newark, DE 19716, USA

<sup>2</sup>Stony Brook University, NY 11794, USA

<sup>3</sup>Neuroscience Program, Lafayette College, Easton, PA 18042, USA

<sup>4</sup>Lead Contact

\*Correspondence: [amygriff@udel.edu](mailto:amygriff@udel.edu)

## 33 Abstract

34 **Functional interactions between the prefrontal cortex and hippocampus, as**  
35 **revealed by strong oscillatory synchronization in the theta (6-11 Hz) frequency**  
36 **range, correlate with memory-guided decision-making. However, the degree to**  
37 **which this form of long-range synchronization influences memory-guided choice**  
38 **remains unclear. We developed a brain machine interface that initiated task trials**  
39 **based on the magnitude of prefrontal hippocampal theta synchronization, then**  
40 **measured choice outcomes. Trials initiated based on strong prefrontal-**  
41 **hippocampal theta synchrony were more likely to be correct compared to control**  
42 **trials on both working memory-dependent and -independent tasks. Prefrontal-**  
43 **thalamic neural interactions increased with prefrontal-hippocampal synchrony**  
44 **and optogenetic activation of the ventral midline thalamus primarily entrained**  
45 **prefrontal theta rhythms, but dynamically modulated synchrony. Together, our**  
46 **results show that prefrontal-hippocampal theta synchronization leads to a higher**  
47 **probability of a correct choice and strengthens prefrontal-thalamic dialogue. Our**  
48 **findings reveal new insights into the neural circuit dynamics underlying memory-**  
49 **guided choices and highlight a promising technique to potentiate cognitive**  
50 **processes or behavior via brain machine interfacing.**

## 51 Introduction

52 Working memory, the ability to temporarily maintain and mentally manipulate  
53 information, is fundamental to cognition (Baddeley, 1986). This ability is known to  
54 require communication across distributed brain regions and is conserved over  
55 mammalia (Goldman-Rakic, 1991; Sarnthein et al., 1998; Lee and Kesner, 2003; Winter  
56 and Stich, 2005; Wang and Cai, 2006; Eichenbaum, 2008; Fell and Axmacher, 2011;  
57 Christophel et al., 2017; Eichenbaum, 2017; Churchwell and Kesner, 2011; Spellman et  
58 al., 2015; Hallock et al., 2016; Ito et al., 2015; Bolkan et al., 2017; Ito et al., 2018;  
59 Maisson et al., 2018; Lugtmeijer et al., 2021). Long-range interactions are thought to be  
60 supported by the proper timing of action potentials (spikes), and brain rhythms are  
61 thought to act as a clocking mechanism to synchronize the timing of spike discharges  
62 (Fries, 2005; Buzsaki, 2006; Fell and Axmacher, 2011; Colgin, 2011; Fries, 2015).  
63 Fluctuations in the local field potential (LFP) are coupled to the organization of  
64 hippocampal spiking activity in rats (O'Keefe and Recce, 1993), primates (Jutras et al.,  
65 2009), and humans (Qasim et al., 2021), although the exact frequency can vary over  
66 mammalia. The hypothesis that brain rhythms coordinate brain communication by  
67 synchronizing neuronal activity, known as "communication through coherence", is just  
68 beginning to be experimentally tested (Fries, 2005; Buzsaki, 2006; Fell and Axmacher,  
69 2011; Fries, 2015; Reinhart and Nguyen, 2019).

70 In rats, decades of research have shown that computations within, and  
71 communication between, the medial prefrontal cortex (mPFC) and hippocampus are

72 required for spatial working memory (Dudchenko et al., 2000; Lee and Kesner, 2003;  
73 Wang and Cai, 2006; Horst and Laubach, 2009; Churchwell and Kesner, 2011; Hallock  
74 et al., 2013a). Recording studies specifically implicate theta synchrony within the  
75 mPFC-hippocampal network as a mechanism for mPFC-hippocampal communication.  
76 One metric of oscillatory synchrony, coherence, has been repeatedly correlated with  
77 memory-guided choices (Jones and Wilson, 2005; Benchenane et al., 2010; Sigurdsson  
78 et al., 2010; O'Neill et al., 2013; Hallock et al., 2016), but also with attention and task  
79 engagement (Guise and Shapiro, 2017; Bygrave et al., 2019). In a cornerstone  
80 experiment, Jones and Wilson (2005) showed that 4-12Hz mPFC-hippocampal  
81 coherence was stronger before rats made a correct choice when compared to a choice  
82 error or a forced navigation trial on a spatial memory task. Importantly, these results are  
83 derived from measurements of magnitude squared coherence, a measurement of signal  
84 correlation, with no requirement for exact numerical phase consistency. For example,  
85 two structures can exhibit strong magnitude squared coherence, despite two signals  
86 being approximately 180-degree offset in phase. This is an important distinction  
87 because there currently exist two versions of the communication through coherence  
88 hypothesis; first, that inter-areal communication varies with signal phase, irrespective of  
89 coherence, and second that inter-areal communication varies with coherence (Vinck et  
90 al., 2023). Likewise, the finding that mPFC-hippocampal theta coherence was stronger  
91 on correct choice outcomes is potentially conflated with the fact that rodent movement  
92 behaviors also change with task performance (Redish, 2016). Due to constraints on  
93 experimental design, it remains unclear as to whether strong theta coherence increased  
94 the likelihood of a correct choice, or whether a correct choice led to stronger theta  
95 coherence. Addressing this question is of critical importance for the potential use of  
96 oscillatory dynamics in therapeutic settings (Reinhart and Nguyen, 2019).

97 We hypothesized that if magnitude squared coherence represents a valid  
98 mechanism for prefrontal-hippocampal communication, that we could use times of  
99 strong mPFC-hippocampal theta coherence to gate access to the choice, and that these  
100 trials would be associated with better performance on memory-guided tasks. To  
101 circumvent a purely correlational experimental design, we developed programmatic  
102 algorithms to define and detect strong and weak oscillatory synchronization, then tied  
103 theta (6-11Hz) coherence magnitude with task manipulation. This brain machine  
104 interface monitored details about task trials, like delay duration and choice outcome,  
105 while dynamically adjusting future trials to serve as within-subject controls. Trials  
106 initiated during times of strong mPFC-hippocampal theta coherence were associated  
107 with correct choice outcomes on both spatial working memory dependent and  
108 independent tasks. In follow-up experiments, we found that mPFC theta rhythms and  
109 mPFC-thalamic interactions increased with mPFC-hippocampal theta synchrony.  
110 Consistent with these results, optogenetic activation of the ventral midline thalamus, a  
111 structure known to coordinate mPFC-hippocampal interactions (Vertes, 2002; McKenna  
112 and Vertes, 2004; Gabbot et al., 2005; Vertes et al., 2006; Hoover and Vertes, 2007;  
113 Hoover and Vertes, 2012; Hallock et al., 2016; Dolleman-van der Weel et al., 2019;

114 Griffin, 2021), dynamically modulated mPFC and hippocampal theta oscillation power  
115 and coherence.

## 116 Results

### 117 Development of a closed-loop brain machine interface for 118 coherence-dependent task manipulation

119 Our first objective was to design and implement a brain machine interface that  
120 would time the initiation of task trials to periods of strong or weak prefrontal-  
121 hippocampal theta synchronization (**Fig. 1A**, **Extended Fig. 1**, **Extended Fig. 3**). To do  
122 this, we first trained rats to perform a delayed spatial alternation task in a T-maze until  
123 reaching 70% choice accuracy on two consecutive days. On this spatial working  
124 memory task, rats are rewarded for alternating between left and right reward zones and  
125 sequestered at the base of the maze before each choice (**Fig. 1A**). The ability of this  
126 task to tax working memory was validated by measuring the impact of delay duration on  
127 choice outcome. Consistent with the use of delayed-response tasks across species  
128 (Dudchenko, 2004; Goldman-Rakic, 1991; Eichenbaum, 2008), longer delay durations  
129 were associated with lower choice accuracy (**Extended Fig. 4A**).

130 Rats were implanted with stainless steel wires targeting the prelimbic and  
131 infralimbic subregions of the medial prefrontal cortex (mPFC) and CA1 of dorsal  
132 hippocampus (**Figs 1A and 2A**) to record local field potentials (LFPs). During training  
133 sessions, thousands of theta coherence values were calculated during the delay  
134 phases, and distributions of mean theta coherence estimates were created (**Extended**  
135 **Fig. 2J**). Using these distributions, we defined weak theta coherence as 1std below the  
136 mean, and strong theta coherence as 1std above the mean of all theta coherence  
137 values. Therefore, each rat had a unique numerical value defining states of strong and  
138 weak theta coherence, which we could then use as thresholds to initiate trials on the  
139 automated maze. Trial initiation is defined by the lowering of the choice-point door to  
140 allow access to the maze (**Fig. 1A**; **Extended Fig. 3**).

141 To support brain machine interfacing (see methods section “Brain machine  
142 interface”), we designed two independent loops, one processing the neural data in real  
143 time and the other controlling the automatic maze (**Extended Fig. 1**; **Fig. 1A**). This  
144 closed loop system allowed us to monitor prefrontal-hippocampal theta coherence in  
145 real time and on a subset of trials, initiate the start of the trial when coherence was  
146 strong or weak. While coherence was being monitored, rats were confined to an area at  
147 the base of the maze. Trials were initiated by opening a door, providing access to the  
148 maze (**Fig. 1A**).

149

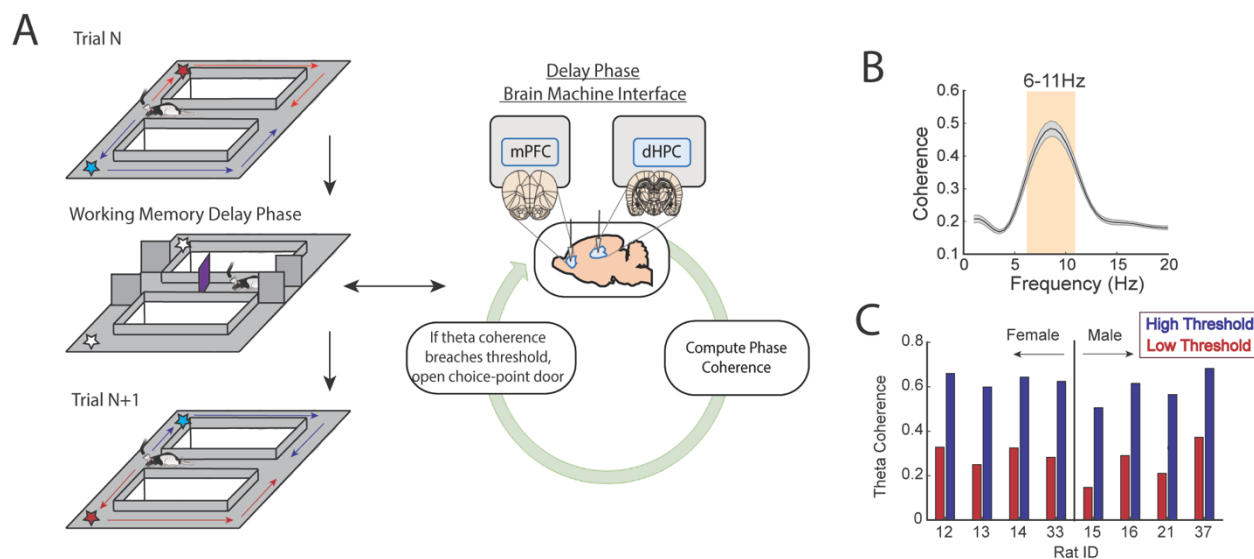

150

151 Figure 1 | A brain machine interface that harnesses endogenous mPFC-  
152 hippocampal theta coherence on a working memory task.

153 **A)** Schematic of brain machine interfacing as rats performed a delayed alternation task  
154 on an automated T-maze. The delayed alternation task requires rats to alternate  
155 between left and right reward zones. Blue arrows and stars denote correct (rewarded)  
156 trajectories while red arrows and stars represent incorrect (unrewarded) trajectories.  
157 The rat was confined to the delay zone with three barriers. On a subset of trials, we  
158 computed mPFC-hippocampal theta coherence in real time during the delay and trials  
159 were initiated contingent upon theta coherence magnitude. **B)** Frequency by coherence  
160 distribution calculated on data collected in real time. For brain machine interfacing  
161 experiments, theta coherence was defined as the averaged coherence values between  
162 6-11Hz. Data are represented as the mean +/- s.e.m. **C)** Thresholds for high and low  
163 magnitude coherence were estimated based on distributions of theta coherence values  
164 that were unique to individual rats (see **Extended Fig. 2** and methods). N = 8 rats (4  
165 female, 4 male).

166

167 **Strong prefrontal-hippocampal theta coherence leads to correct**  
168 **choices on a spatial working memory task**

169 Based on multiple reports, mPFC-hippocampal theta coherence is positively  
170 correlated with memory-guided decision making (Jones and Wilson, 2005; Benchenane  
171 et al., 2010; Hallock et al., 2016), but whether theta coherence can be harnessed to  
172 bias choice accuracy remains unexplored. To test this idea, we implemented the  
173 algorithms described above with an automatic maze to control trial onset via lowering  
174 the door for access to the choice (**Fig. 1A**; **Extended Figs 1 and 3**). During

175 experimentation, our brain machine interface was activated as rats occupied the delay  
176 zone and rats were presented with various trial types within a given session as follows.  
177 A small proportion of trials were initiated when mPFC-hippocampal theta coherence  
178 was above the strong theta coherence threshold (~10% of trials) or below the weak  
179 theta coherence threshold (~10% of trials) (**Fig. 2A and 2B**). Since increasing delay  
180 durations led to worse task performance (**Extended Fig. 4A**), rats also experienced  
181 trials that were yoked to high and low coherence trials via identical delay durations. For  
182 example, if trial N was a high coherence trial, our algorithm logged the duration spent in  
183 the delay zone to be presented back to the rat within a 10-trial block. Thus, initiation of  
184 yoked trials was independent of the strength of theta coherence (**Fig. 2C**) and by  
185 comparing choice accuracy on strong/weak coherence trials to that on yoked trials, we  
186 were able to rule out the possible confounding variable of working memory load on  
187 choice accuracy.

188 We predicted that, relative to yoked control trials, trials presented during states of  
189 strong mPFC-hippocampal theta coherence would be more likely to be correct and trials  
190 presented during states of weak mPFC-hippocampal theta coherence would be more  
191 likely to be incorrect. Consistent with our first prediction, presenting trials during  
192 elevated states of mPFC-hippocampal theta coherence improved choice accuracy (**Fig.**  
193 **2D**). However, choice accuracy on trials presented during states of low mPFC-  
194 hippocampal theta coherence did not differ from choice accuracy on yoked control trials,  
195 indicating that naturally occurring weak theta synchronization does not impair choice  
196 outcomes.

197 Most task trials (~80%) were initiated after a random delay, irrespective of the  
198 magnitude of mPFC-hippocampal theta coherence. We next analyzed whether random  
199 delay trials that were coincident with strong mPFC-hippocampal theta coherence also  
200 led to correct choice outcomes. First, compared to brain machine interfacing trials,  
201 random delay trials coincident with strong mPFC-hippocampal theta coherence were  
202 found to be significantly longer in duration (**Extended Fig. 5A**; BMI trials: mean =  
203 11.55s, std = 1.51s; Random Trials with Strong Theta Coherence: mean = 15.5s, std =  
204 2.2s), an important finding because task performance is impacted by time spent in the  
205 delay (**Extended Fig. 4A**). Unlike brain machine interfacing trials, which had yoked  
206 conditions built into 10-trial blocks to account for changing behavior over time, random  
207 delay trials that were triggered during strong mPFC-hippocampal theta coherence  
208 states were not programmed to have a control. As such, we approximated a yoked  
209 condition by identifying random delay trials with identical delay durations as random  
210 delay trials with high theta coherence (**Extended Fig. 5C**). These trials were distributed  
211 throughout the session and were unequal in contribution (i.e. there may exist multiple 7s  
212 trials to match a 7s random trial with coincident strong theta coherence). Although there  
213 was no significant difference between random delay trials coincident with strong theta  
214 coherence compared to trials with identical delay durations ( $p = 0.059$ ; **Extended Fig.**  
215 **5B**), 6/8 animals showed better task performance when mPFC-hippocampal theta  
216 coherence was strong (**Extended Fig. 5D**). Given that this comparison is fundamentally



217 different from the brain machine interfacing experiment due to imbalanced design  
218 between estimated yoked trials and random trials with high coherence, and did not  
219 account for trials with potential salient/distracting events in the environment, we  
220 consider these results consistent with our brain machine interfacing findings.

221 We then examined various measurements of overt behavior to test if behaviors  
222 differed between coherence-triggered trials and yoked trials. First, we examined the  
223 amount of time spent until rats made a choice, defined as the amount of time from the  
224 point at which a trial is initiated until rats passed the infrared beam that triggers the  
225 reward dispenser (**Extended Fig. 1**). While we found no difference in time-to-choice  
226 between high coherence trials and yoked trials, there was a trending difference between  
227 low and yoked trials (**Extended Fig. 4B**). Using an analysis to test head-movement  
228 complexity (IdPhi; Papale et al., 2012; Redish, 2016), we found no differences between  
229 high coherence trials and yoked trials but did observe less head-movement complexity  
230 on low coherence trials relative to yoked trials (**Extended Fig. 4C**). Next, we analyzed  
231 total distance traveled in the epoch used to trigger trials during high and low coherence  
232 states (last 1.25s before trial initiation). Since the amount of time was always consistent  
233 (1.25s), this approach is a proxy for speed, an indirect correlate of theta frequency  
234 (Kropff et al., 2021). We found no differences in movement behavior between  
235 coherence trials and yoked trials (**Extended Fig. 4D**). Finally, we found that rats spent  
236 similar amounts of time in the delay zone during high and low coherence trials  
237 (**Extended Fig. 4E**). These analyses show that high coherence trials could be used to  
238 promote correct choices in the absence of overt differences in behavior between trial  
239 types, indicating that mPFC-hippocampal theta coherence preceding the choice  
240 potentially influences choice outcome.

241

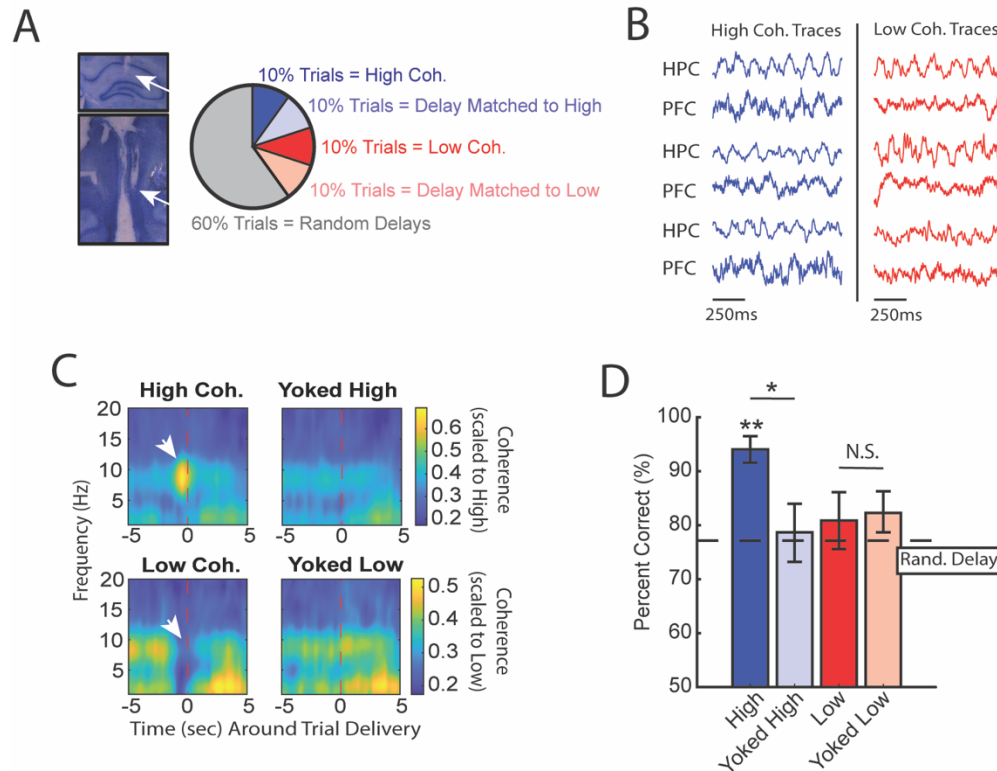

242

243 Figure 2 | High mPFC-hippocampal theta coherence can be used to  
244 enhance performance of a working memory dependent task

245 **A) Left panel:** Histology from a representative rat showing electrode tracks in the dorsal  
246 hippocampus (top) and mPFC (bottom). **Right panel:** Distribution of trial-types within a  
247 session. Within 10-trial blocks, 20% of trials were initiated based on high or low mPFC-  
248 hippocampal theta coherence, 20% of trials were yoked to the high/low coherence trials,  
249 and 60% were triggered following a random delay (5-30s). Yoked trials were identical in  
250 delay duration as high/low coherence trials, but triggered independent of coherence  
251 magnitude to control for the negative correlation between delay length and task  
252 performance (**Extended Fig. 4A**). **B)** Example LFP traces recorded during high and low  
253 coherence trials from three representative rats. The mPFC and hippocampal signals  
254 were used to compute theta coherence in real-time. **C)** Rat-averaged coherograms  
255 representing time around trial initiation (x-axis), coherence frequency (y-axis) and  
256 coherence magnitude, with warmer colors indicating higher coherence values. White  
257 arrows denote strong (top panel) and weak (bottom panel) theta coherence, as  
258 expected on trials triggered during high and low coherence states. Notice that on yoked  
259 trials, coherence was rather consistent before and after trial initiation, as expected for  
260 trials triggered independent of coherence magnitude. **D)** Relative to yoked trials,  
261 presenting choices to rats when mPFC-hippocampal theta coherence was high led to  
262 improved task performance ( $t(7) = 2.85$ ,  $p_{p.c.} = 0.0248$ ). Trials contingent upon low  
263 magnitude theta coherence did not impact task performance compared to delay  
264 matched controls ( $t(7) = -0.26$ ,  $p_{p.c.} = 0.80$ ; paired t-test). Follow-up statistical testing



265 revealed that choice accuracy on high coherence trials was significantly greater than  
266 choice accuracy on random delays, consistent with our planned comparisons between  
267 high and yoked trials ( $t(7) = 6.12$ ;  $p_{(x4)} = 0.002$ ). See **Extended Table 1** for statistics. \*  
268  $p < 0.05$ , \*\* $p < 0.01$ . Stars (\*\*) above bar graph denotes significance as measured from  
269 comparisons relative to random delay choice outcomes (black) and relative to 70%  
270 criterion (gray). Subscript “P.C.” indicates planned comparisons. Subscript “(x4)”  
271 indicates unplanned comparisons with Bonferroni corrected p-values for the number of  
272 unplanned tests performed. N = 8 rats (4 male, 4 female).

273 **Trials initiated by strong prefrontal-hippocampal theta coherence**  
274 **are characterized by prominent prefrontal theta rhythms and**  
275 **heightened pre-choice prefrontal-hippocampal synchrony**

276 Next, we performed offline data analysis to understand the neural dynamics  
277 occurring during the high coherence states that improved spatial working memory task  
278 performance. First, we noticed that theta rhythms were better characterized by changes  
279 within the 6-9Hz range (**Fig. 3A**) and as such, offline analyses focused on this narrow  
280 band. Relative to low coherence states, mPFC theta rhythms were stronger during high  
281 coherence states (**Fig. 3A-3B**; see **Fig. 2B** for example LFP traces). Hippocampal theta  
282 rhythms only exhibited a modest elevation in theta power relative to low coherence  
283 states. With respect to theta frequency, mPFC theta rhythms were shifted towards  
284 higher frequencies during high coherence states (mean theta frequency = 5.8Hz)  
285 relative to low coherence states (mean theta frequency = 5Hz) (**Fig. 3C**). While there  
286 was no significant difference in hippocampal theta frequency, 6/8 rats showed higher  
287 theta frequency during high mPFC-hippocampal theta coherence states (mean theta  
288 frequency during high coherence states = 7Hz; mean theta frequency during low  
289 coherence states = 6.5Hz). We then analyzed whether these signals exhibited evidence  
290 of directionality, the ability for one signal to predict another signal as measured by  
291 Granger causality analysis (Cohen, 2014). Relative to low coherence states, high  
292 coherence states were characterized by stronger hippocampal-to-mPFC theta  
293 directionality (**Fig. 3D**). Thus, the high theta coherence states used to trigger spatial  
294 working memory trials were characterized by strong mPFC theta rhythms and  
295 hippocampal-to-mPFC theta directionality.

296 Even though the delay zone was physically close to the choice point (~30cm), we  
297 wondered whether strong mPFC-hippocampal theta coherence trials impacted  
298 synchronization during the goal-arm choice. Therefore, we defined choice-point entry as  
299 the infrared beam break immediately preceding the choice (**Extended Fig. 1**). On  
300 average, rats took 1.6s and 2.1s to reach this infrared beam from trial initiation on low  
301 and high coherence trials, respectively. No significant difference in time-to-choice was  
302 observed between high and low coherence trials (**Fig. 3E**). Thus, we extracted LFPs  
303 from -2s to +0.5s surrounding choice-entry (**Fig. 3E**), and calculated coherence over  
304 time and frequency (**Fig. 3F**). A normalized difference score was calculated from the

305 resultant coherograms (high-low/high+low), revealing a clear difference in theta  
 306 coherence magnitude between high and low coherence trials as rats approached the  
 307 choice zone (**Fig. 3G**). As expected, high coherence trials showed significantly stronger  
 308 synchronization at -2s, an approximate for trial initiation (**Fig. 3H**). Interestingly, after the  
 309 2s time-point, theta coherence between high and low coherence trials became more  
 310 similar, but once again differed at ~0.4-0.5s pre-choice and post-choice entry (**Fig. 3H**).  
 311 This latter result shows that strong mPFC-hippocampal theta coherence during the  
 312 delay was maintained throughout choice.

313

314

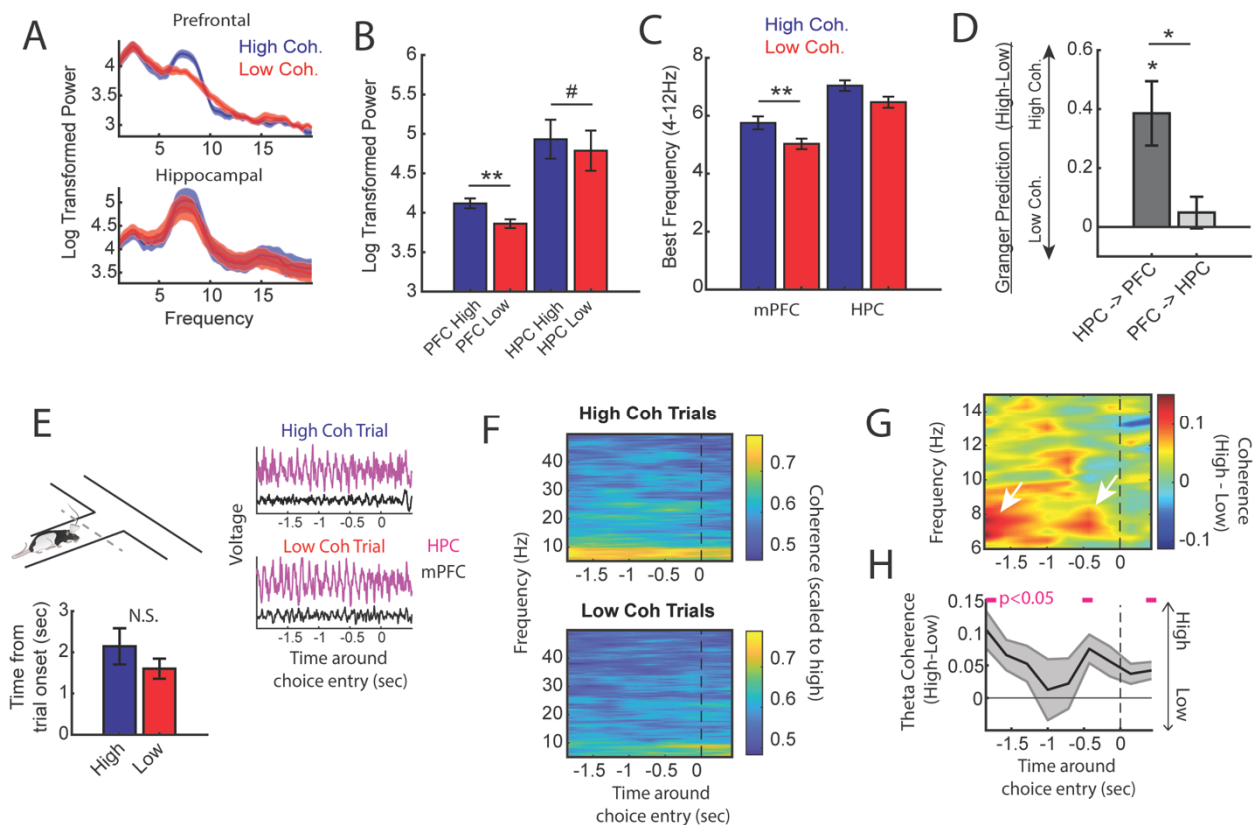

315

316 **Figure 3 | High mPFC-hippocampal theta coherence trials are gated by**  
 317 **prefrontal theta rhythms and lead to heightened pre-choice synchrony**

318 **A)** Prefrontal and hippocampal power spectra during the high and low coherence  
 319 epochs used for brain machine interfacing (**Fig. 1 and 2**). **B)** Prefrontal theta power (6-  
 320 9Hz) was significantly greater during high coherence epochs relative to low coherence  
 321 epochs ( $t(7) = 5.3$ ,  $ci = 0.14$  to  $0.37$ ,  $p_{adj(x2)} = 0.002$ ). Hippocampal theta power was  
 322 stronger on high coherence compared to low coherence trials ( $t(7) = 2.47$ ,  $ci = 0.006$  to  
 323  $0.28$ ,  $p_{adj(x2)} = 0.08$ ,  $p_{not-adj} = 0.0427$ ). **C)** The frequency of prefrontal theta oscillations  
 324 was significantly higher during high coherence states relative to low coherence states

325 (PFC:  $t(7) = 3.08$ ,  $p_{\text{adj}(x2)} = 0.036$ ,  $ci = 0.16$  to  $1.3$ ; hippocampus:  $t(7) = 1.8$ ,  $ci = -.17$  to  
326  $1.3$ ,  $p = 0.11$ ). Note that 6/8 rats showed higher theta frequency in the hippocampus on  
327 high theta coherence states relative to low theta coherence states. Theta frequency was  
328 measured by identifying the frequency corresponding to maximum theta power. **D)**  
329 Hippocampal-to-prefrontal theta directionality was significantly stronger during high  
330 theta coherence states relative to low theta coherence states ( $t(7) = 3.53$ ,  $ci = [0.12$  to  
331  $0.64]$ ,  $p_{\text{adj}(x3)} = 0.029$ ) and was significantly stronger than granger prediction in the  
332 prefrontal-to-hippocampal direction ( $t(7) = 3.33$ ,  $ci = 0.097$  to  $0.57$ ,  $p_{\text{adj}(x3)} = 0.038$ ). No  
333 significant effect was observed in the prefrontal-hippocampal direction ( $t(7) = 0.909$ ,  $p =$   
334  $0.39$ ). **E)** LFP signals (jittered for visualization) were extracted from 2s before choice  
335 point entry (as defined by infrared beam breaks) and 0.5s afterwards. Bar graphs show  
336 that the average time to choice-entry for high coherence and low coherence trials was  
337 between 1.6-2.1s and did not significantly differ between trial-types ( $t(7) = 2.0$ ,  $p = 0.08$ ).  
338 **F)** Averaged coherograms ( $N = 8$  rats) showing coherence as a function of frequency  
339 and time surrounding choice point entry. **G)** Difference of the coherograms shown in **F**.  
340 White arrows point to initial 6-9Hz synchronization at -2s which approximates trial onset  
341 (see bar graph in **E**), and a second time point of heightened theta synchrony before  
342 choice entry. **H)** Normalized difference scores representing theta coherence as a  
343 function of time. Theta coherence at choice-entry was significantly stronger on trials  
344 triggered by high coherence relative to trials triggered during low coherence (see  
345 **Extended Table 2** for raw and corrected p-values). Data are represented as the mean  
346  $\pm$  s.e.m. across 8 rats. \* $p < 0.05$ , \*\* $p < 0.01$  paired t-tests with Bonferroni p-value  
347 corrections when  $p < 0.05$ . Difference scores were tested against a null of 0. Magenta  
348 lines denote  $p < 0.05$  after Benjamini Hochberg corrections.

349

350 We observed mPFC-hippocampal theta coherence to fluctuate rhythmically  
351 (**Extended Figs 2H and 6B**), and therefore wondered how predictive past values of  
352 mPFC-hippocampal theta coherence were of future values. Using previously collected  
353 data (Hallock et al., 2016), we extracted mPFC-hippocampal theta coherence epochs  
354 across the duration of a 30s delay on the delayed alternation task from 3 rats ( $N = 22$   
355 sessions; **Extended Figs 6A and 7A**). We performed an autocorrelation analysis on  
356 theta coherence values on a trial-by-trial basis, then compared the results to a  
357 temporally shuffled theta coherence distribution. Since we performed a moving window  
358 approach (1.25s in 250ms steps), comparisons between real and temporally shuffled  
359 coherence estimates were only included after 5 lags (lag #4 relative to 0; **Extended Fig.**  
360 **6C**). While theta coherence values were predictive of future theta coherence values, this  
361 effect slowly decayed over time, indicating that despite some observations of periodicity,  
362 the fluctuations were largely non-periodical (**Extended Fig. 6C**).

363 In our brain machine interfacing experiments, trials were initiated when mPFC-  
364 hippocampal theta coherence was strong or weak. States of strong mPFC-hippocampal  
365 theta coherence increased the probability of a correct choice, while increasing

366 synchronization during task performance. However, when we examined the frequency  
367 of strong mPFC-hippocampal theta coherence events when the delay phase was fixed  
368 and predictable, strong mPFC-hippocampal theta coherence events did not predict trial  
369 initiation (**Extended Fig. 6D**). When considered with the results above, mPFC-  
370 hippocampal theta coherence events predict choice outcome, rather than trial onset.  
371

## 372 Prefrontal-hippocampal theta coherence states lead to correct 373 choices on a conditional discrimination task

374 Our findings from **Fig. 2** show that mPFC-hippocampal theta coherence leads to  
375 correct spatial working memory-guided choices. We next wondered if this effect was  
376 specific to spatial working memory and specifically tested whether strong mPFC-  
377 hippocampal theta coherence events were optimal for choices on a task where rats  
378 must attend to external stimuli to guide decision making. Rats (N = 3; 1 male, 2 female)  
379 were implanted with wires targeting the mPFC and hippocampus (**Fig. 4B**) and were  
380 trained to perform a conditional discrimination task where a floor insert dictated choice  
381 outcome (e.g. a wooden floor insert signals a left choice, while a mesh insert signals a  
382 right choice; **Fig. 4A**). This task is similar in difficulty to the delayed alternation task, but  
383 requires the dorsal striatum, rather than the hippocampus to perform (Hallock et al.,  
384 2013a). Likewise, past research showed that inactivation of the mPFC or the ventral  
385 midline thalamus did not disrupt conditional discrimination task performance in well-  
386 trained rats (Hallock et al., 2013b, Shaw et al., 2013), indicating that the mPFC-  
387 hippocampal network is not required for conditional discrimination task performance.  
388 Therefore, we predicted that strong mPFC-hippocampal theta coherence would not  
389 improve choice outcomes on this conditional discrimination task.

390 We collected 35 sessions, of which 16 sessions (7 sessions from 21-48 [male]; 4  
391 sessions from 21-49 [female]; and 5 sessions from 21-55 [female]) met criterion for  
392 performance of >70%, alternation of <70%, and a contribution of at least 3 trials.  
393 Unexpectedly, we found that initiation of trials during strong mPFC-hippocampal theta  
394 coherence enhanced choice accuracy on the conditional discrimination task (**Fig. 4C**).  
395 This finding was surprising given that mPFC-hippocampal theta coherence did not  
396 previously correlate with choice outcomes on the conditional discrimination task  
397 (Hallock et al., 2016), but consistent with increased mPFC-hippocampal theta  
398 coherence on a different cue-guided paradigm (Benchenane et al., 2010). Most  
399 importantly, these results show that strong mPFC-hippocampal theta coherence is  
400 optimal for decision making behavior regardless of whether working memory and  
401 mPFC/hippocampal function is necessary to perform a task.

402

403

404

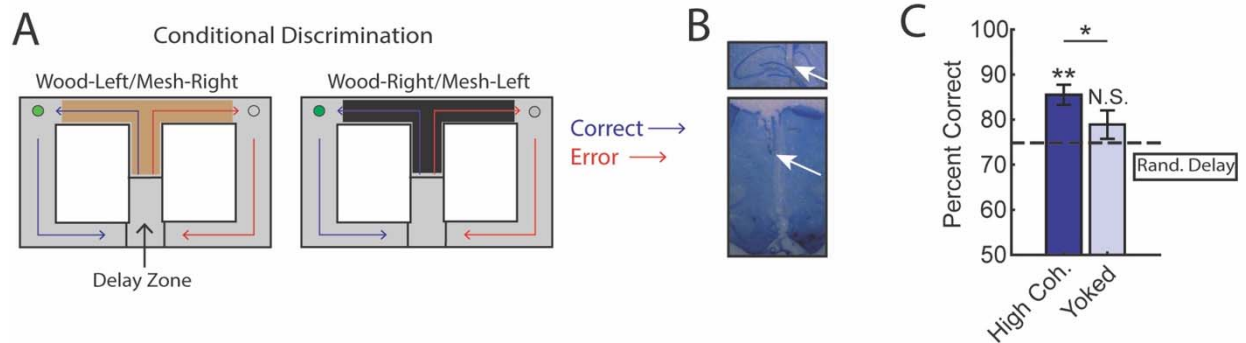

405

406 Figure 4 | Trials initiated by strong mPFC-hippocampal theta coherence  
407 enhance task performance on a two-choice conditional discrimination task

408 **A)** Schematic of the conditional discrimination task. Wooden or mesh floor inserts were  
409 used to guide choice behavior. Rats were randomly assigned to insert-reward  
410 contingencies. Like the brain machine interfacing experiment on the delayed alternation  
411 task, trials were initiated when rats were sequestered in the delay zone. **B)** Example  
412 histology from a representative rat showing electrode placements in the hippocampus  
413 and mPFC. **C)** Trials initiated during high mPFC-hippocampal theta coherence states  
414 led to better task performance when compared to yoked control trials ( $t(15) = 2.23$ ,  $ci =$   
415  $0.29$  to  $12.87$ ,  $p_{(p.c.)} = 0.04$ ) or when compared to trials triggered following a random  
416 delay ( $t(15) = 3.8$ ,  $ci = 4.7$  to  $16.6$ ,  $p_{(x2)} = 0.002$ ). There was no difference in choice  
417 outcome following yoked and random delay trials ( $t(15) = 1.0$ ,  $ci = -4.5$  to  $12.7$ ,  $p_{(x2)} =$   
418  $0.33$ ). \* $p < 0.05$ . \*\* $p < 0.01$ . Subscript on p-values show if comparisons were planned  
419 ('p.c.') or corrected for multiple comparisons ('x2'). Data are represented as the mean  $\pm$   
420 s.e.m.  $N = 16$  sessions over 3 rats.

421

## 422 Prefrontal-thalamo-hippocampal network dynamics vary with 423 prefrontal-hippocampal synchronization

424 So far, we have shown that initiating trials when mPFC-hippocampal theta  
425 synchrony is strong leads to correct memory-guided choices. What are the mechanisms  
426 supporting strong mPFC-hippocampal theta synchrony leading to improved choice  
427 accuracy? Past research showed that mPFC-hippocampal theta synchrony during  
428 choice was supported by the ventral midline thalamus (VMT; Hallock et al., 2016). The  
429 VMT is anatomically connected with the mPFC and hippocampus (Sesack et al., 1989;  
430 Vertes, 2002; McKenna and Vertes, 2004; Vertes, 2006; Hoover and Vertes, 2007;  
431 Hoover and Vertes, 2012), providing a source of glutamatergic excitation to both  
432 structures (Dolleman-van der Weel et al., 2019). Therefore, we wondered how mPFC-



433 VMT and VMT-hippocampal interactions varied with mPFC-hippocampal theta  
434 synchronization.

435 To probe this question, we examined datasets with simultaneous mPFC, VMT,  
436 and dorsal hippocampus recordings from 3 rats performing a spatial working memory  
437 task (N = 22/28 sessions; **Fig. 5A**; **Extended Fig. 7B**; Stout and Griffin, 2020). We  
438 extracted neural data as rats occupied the delay zone, then defined and detected  
439 epochs of strong and weak mPFC-hippocampal theta coherence offline (**Fig. 5B**;  
440 **Extended Fig. 7A-B**). Corroborating the findings from our brain machine interfacing  
441 experiment (**Figs 2 and 3**), high theta coherence states were characterized by strong 6-  
442 9Hz theta rhythms in the mPFC (**Figs 5C and 5D**). Intriguingly, the magnitude change  
443 of theta power between high and low coherence states was strongest in the mPFC,  
444 followed by the VMT, then the hippocampus (**Fig. 5D**). Relative to low coherence  
445 epochs, the mPFC was differentially and simultaneously synchronized to the VMT and  
446 hippocampus during high coherence states (**Fig. 5E**). Moreover, high coherence states  
447 were characterized by a stronger change in neural synchronization between the mPFC  
448 and VMT, relative to the VMT and hippocampus (**Fig. 5F**). This latter result suggested  
449 that mPFC-VMT interactions may be particularly sensitive to mPFC-hippocampal  
450 synchronization. In support of this conclusion, multivariate granger prediction revealed  
451 that mPFC-VMT directionality was elevated during strong relative to weak mPFC-  
452 hippocampal theta coherence states (**Fig. 5G**; *middle panel*). mPFC-hippocampal  
453 directionality was also modulated by mPFC-hippocampal theta coherence magnitude.  
454 However, directionality between the VMT and hippocampus was minimally impacted by  
455 the magnitude of mPFC-hippocampal theta coherence (**Fig. 5G**).

456 Lastly, we examined whether mPFC spike-LFP synchrony was impacted by  
457 mPFC-hippocampal theta coherence. Spike-phase entrainment was used to quantify  
458 the non-uniformity of spike-phase distributions at theta to measure theta phase locking,  
459 and spike-field coherence was used to understand the correlation between spikes and  
460 LFP across frequencies (**Fig. 5H**). Out of 126 mPFC neurons, 46 neurons met criterion  
461 for inclusion (see methods). When comparing strong to weak mPFC-hippocampal theta  
462 coherence states, there were no significant differences to theta phase entrainment (**Fig.**  
463 **5I**) nor to spike-field coherence (**Fig. 5J**) of mPFC spikes to VMT and hippocampal  
464 theta.

465 We then wondered if strong mPFC-hippocampal theta coherence states  
466 modulated the spike timing of a select group of mPFC neurons. During strong mPFC-  
467 hippocampal theta coherence states, 8.9% and 7% of mPFC neurons were modulated  
468 by hippocampal theta and VMT theta, respectively. This contrasted with weak mPFC-  
469 hippocampal theta coherence states, where 4.4% and 2.3% of mPFC neurons were  
470 significantly modulated by hippocampal and VMT theta, respectively (**Fig. 5K**). These  
471 findings indicate that the magnitude of mPFC-hippocampal theta synchronization was  
472 unrelated to global changes to mPFC spike entrainment to VMT and hippocampal theta  
473 rhythms. Instead, relative to low coherence states, states of high mPFC-hippocampal



474 theta coherence were associated with strong mPFC spike phase locking to VMT and  
 475 hippocampal theta rhythms in a small group of mPFC neurons.

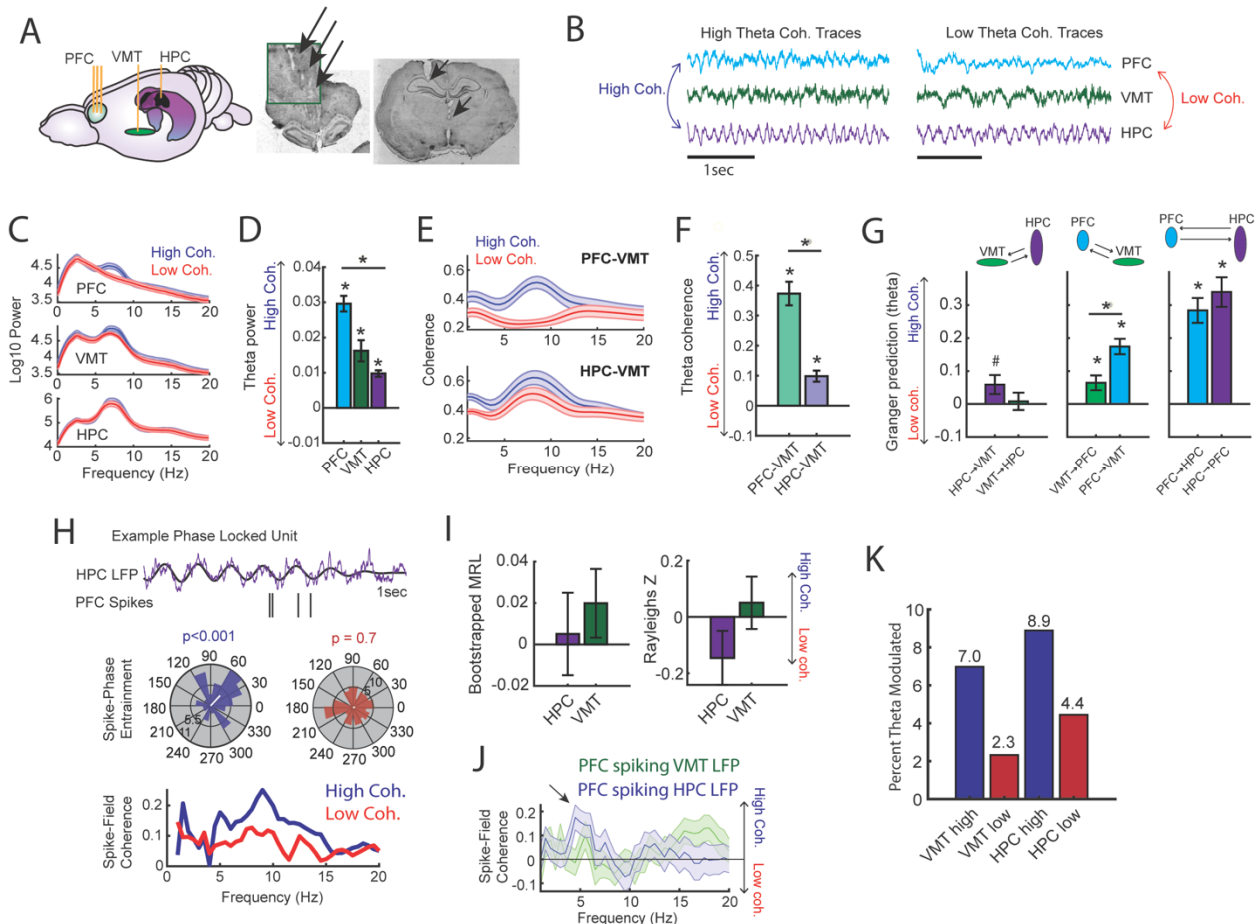

476  
 477

478 Figure 5 | Prefrontal-hippocampal theta synchronization modulates  
 479 prefrontal-thalamic interactions

480 **A)** LFPs were recorded from the mPFC, VMT and hippocampal of 3 rats (N = 22  
 481 sessions). *Right panel* shows triple site recordings taken from a representative rat.  
 482 Green box shows example tetrode tracks from the mPFC. **B)** High and low mPFC-  
 483 hippocampal theta coherence epochs were identified, and LFP from the VMT was  
 484 extracted. The data shown are collapsed across high or low coherence epochs. **C)**  
 485 Frequency by coherence plots from the mPFC (top panel), VMT (middle panel), and  
 486 hippocampus (bottom panel). Compare these data to **Fig. 3**. **D)** Normalized difference  
 487 scores comparing theta (6-9Hz) power between high and low coherence epochs. There  
 488 was a main effect of brain region on the coherence difference score ( $F(2,65) = 20.8$ ;  $p <$   
 489  $0.001$ ; one-way ANOVA) with each brain area showing higher theta power during high  
 490 coherence states relative to low coherence states (PFC:  $p < 0.001$ ; VMT;  $p < 0.001$ ;  
 491 HPC:  $p < 0.001$ ; see **Extended Table 3**). **E)** Theta coherence for mPFC-VMT and VMT-  
 492 HPC was estimated during high and low mPFC-hippocampal theta coherence states. **F)**

493 mPFC-VMT and VMT-HPC theta coherence was stronger during high when compared  
494 to low mPFC-hippocampal theta coherence states. mPFC-VMT theta coherence  
495 changed more drastically with mPFC-hippocampal theta coherence magnitude (mPFC-  
496 VMT:  $p < 0.001$ ; VMT-HPC:  $p < 0.001$ ; mPFC-VMT vs VMT-HPC:  $p < 0.001$ ; see  
497 **Extended Table 4**). **G**) Multivariate granger prediction analysis. *Left panel* shows VMT-  
498 HPC theta directionality. *Middle panel* shows mPFC-VMT theta directionality. *Right*  
499 *panel* shows mPFC-hippocampal theta directionality. Granger prediction in the mPFC-  
500 to-VMT direction was more sensitive to mPFC-hippocampal theta coherence magnitude  
501 when compared to granger prediction in the VMT-to-mPFC direction (statistics in  
502 **Extended Table 5**). **H**) *Top panel* shows hippocampal LFP (1-sec) and example spikes  
503 from an mPFC neuron with significant spike-theta entrainment. *Middle panel* shows  
504 polar plots of the unit in the top panel. Histogram represents the distribution of spike-  
505 phase values with the mean result length vector shown as a white bar in the center.  
506 *Bottom panel* shows spike-field coherence for the same neuron. **I**) Difference score  
507 (high-low/high+low) of bootstrapped MRL and Rayleighs Z-statistic for each neuron as a  
508 function of hippocampal or VMT theta. No significant differences were found between  
509 high and low mPFC-hippocampal theta coherence states. **J**) Spike-field coherence,  
510 represented as a difference score. No effects survived p-value correction. Arrow points  
511 to a numerical increase to spike-field coherence at hippocampal 4-6Hz. **K**) Percentage  
512 of significantly modulated mPFC units to VMT theta and hippocampal theta as a  
513 function of strong (blue) or weak (red) mPFC-hippocampal theta coherence states.  
514 \* $p < 0.05$ . Data are represented as the mean  $\pm$  s.e.m.

## 515 Optogenetic activation of the VMT dynamically regulates 516 prefrontal-hippocampal theta rhythms

517 Next, we examined whether artificial theta frequency stimulation of the VMT was  
518 sufficient to produce synchronized theta rhythms between the mPFC and hippocampus.  
519 To investigate this question, we injected the VMT with AAV5-hSyn-ChR2-eYFP to  
520 create and embed channelrhodopsin2 at the membrane of VMT neurons, a light-gated  
521 cation channel that promotes excitation of neurons with blue light stimulation (450nm).  
522 This injection was combined with simultaneous recordings from the mPFC and  
523 hippocampus, as well as a fiber placed in the VMT (**Fig. 6A**). After 4-6 weeks of  
524 recovery to allow for viral expression, we pulsed a blue laser targeting the VMT while  
525 recording from the mPFC (N = 3/3 rats) and the hippocampus (N = 2/3 rats; **Fig. 6A**). As  
526 a within-subject control, we also stimulated the VMT with a red laser (638nm).  
527 Stimulation with red and blue lasers were randomly interleaved within a recording  
528 session and various parameters were explored to identify candidate parameters that  
529 would facilitate mPFC-hippocampal coherence.

530 Optogenetic stimulation of the VMT produced a large negative deflection in the  
531 mPFC voltage (**Fig. 6D**), but reliably increased mPFC oscillation power that closely  
532 matched the VMT stimulation frequency across all animals and sessions (**Extended**

533 **Fig. 9).** VMT theta rhythm stimulation increased the power of mPFC theta oscillations  
534 across all recording channels from a 64ch silicone probe targeting mPFC lamina (**Fig.**  
535 **6B-C**; see **Extended Fig. 8** as a companion figure to **Fig. 6C**). Stimulation of the VMT  
536 at 7, 15, or 30Hz produced clear changes to the mPFC power spectrum, while 4Hz  
537 stimulation was more variable across shanks (**Extended Fig. 9H**). VMT theta  
538 stimulation did not always increase or change hippocampal theta rhythm power, but it  
539 often increased or changed the shape of the power spectrum (**Extended Figs. 9A-G**).  
540 Surprisingly, optogenetic activation of the VMT at 7-8Hz was largely disruptive to  
541 mPFC-hippocampal theta coherence (**Extended Fig. 9A-G**), but was nonetheless  
542 capable of increasing mPFC-hippocampal theta coherence at unexpected frequencies  
543 (**Fig. 6E**). Specifically, VMT stimulation was better capable of increasing mPFC-  
544 hippocampal theta coherence when timed with real-time monitoring of hippocampal  
545 oscillations and with sufficient activation. For example, in rat #2, we detected  
546 hippocampal oscillation power between 1-50Hz and timed VMT stimulation when 8Hz  
547 power was the strongest frequency. This approach increased mPFC-hippocampal theta  
548 coherence in the 9Hz band (**Fig. 6E**). Yet, 7Hz stimulation without timing it to  
549 hippocampal oscillatory activity had no effect on mPFC-hippocampal theta coherence  
550 (**Extended Fig. 9G**). Likewise, in rat #3, 7.5Hz stimulation was sufficient to enhance  
551 mPFC-hippocampal theta coherence at 8.3-8.4Hz at 4.5mW, but the same was not true  
552 at 1mW power (**Fig. 6E** and **Extended Fig. 9A-C**).

553 While we expected VMT stimulation to strengthen mPFC-hippocampal theta  
554 coherence, these results indicate that square-wave optogenetic stimulation of the VMT  
555 does not pose a viable approach to strengthen mPFC-hippocampal coherence without  
556 consideration of on-going oscillatory dynamics. Instead, VMT stimulation most  
557 effectively produces closely matched oscillations in the mPFC, a finding with interesting  
558 implications for diseases characterized by a disrupted thalamic complex (Elvsåshagen  
559 et al., 2021). Future research should perform a systemic characterization of the  
560 parameter space and opsins that allow VMT activation with optogenetics to produce  
561 mPFC-hippocampal theta coherence. This study is warranted given the growing  
562 hypothesis that the VMT regulates mPFC-hippocampal oscillatory dynamics (Dolleman-  
563 van der Weel et al., 2019).

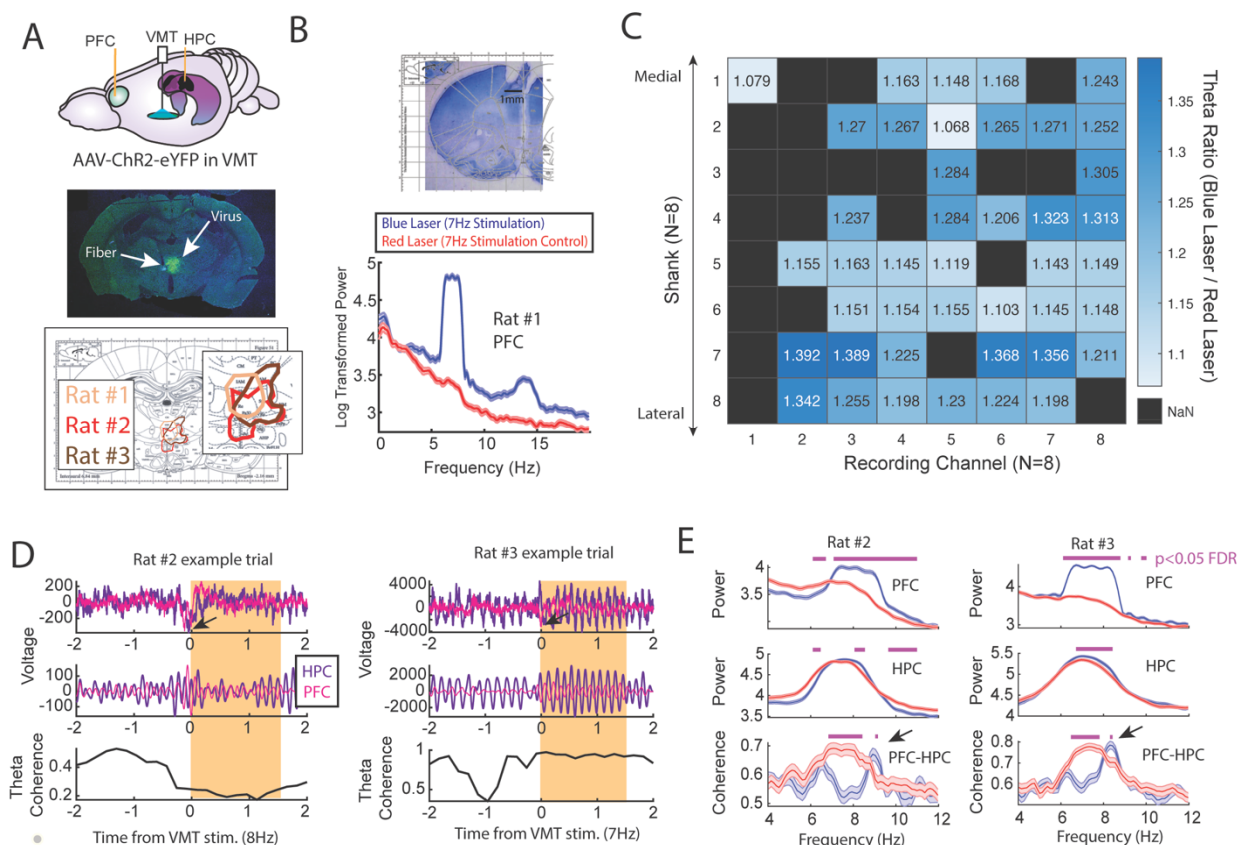

564

565 Figure 6 | Optogenetic activation of the ventral midline thalamus increased  
 566 prefrontal and hippocampal theta power while dynamically adjusting the  
 567 mPFC-hippocampal theta coherence distribution

568 **A)** *Top panel*, Schematic demonstrating recordings from the mPFC and hippocampus  
 569 with optogenetic activation of the VMT. *Middle panel*, example histological confirmation  
 570 of fiber implant and viral expression targeting the VMT. *Bottom panel*, Viral expression  
 571 at similar viral injection coordinates. Notice that all rats showed overlap in viral  
 572 expression in the nucleus reuniens (brain section overlay from Paxinos and Watson,  
 573 2006). **B)** *Top panel*, histological confirmation of 64ch silicon probe recordings in the  
 574 dorsal medial prefrontal cortex. *Bottom panel*, Optogenetic activation of the VMT at 7Hz  
 575 produced prefrontal theta rhythms (N = 83 blue, 88 red laser events; rat #1). **C)** Ratio of  
 576 log-transformed mPFC theta (6-9Hz) power between blue and red laser events across  
 577 silicon probe shanks and channels. Values > 1 indicate that theta during blue laser  
 578 epochs was stronger than during red laser epochs. “NaN” represents an excluded  
 579 channel. See **Extended Fig. 8** for companion figure. Columns represent recording  
 580 channels per shank, while rows represent shank number from the corresponding  
 581 medial-lateral placement in the mPFC **(B)**. **D)** Data from rat #2 (N = 108 blue, 104 red  
 582 laser events) and rat #3 (N = 113 blue, 101 red laser events). *Top panel* shows raw LFP  
 583 traces, *middle panel* shows theta filtered traces (6-9Hz), while the *bottom panel* shows  
 584 theta coherence as a function of time. Yellow box shows the stimulation event. Arrows



585 point to observed negative deflections in the LFP signals surrounding VMT stimulation  
586 onset. **E**) Power and coherence analyses performed on data during VMT stimulation (0-  
587 1.5s from laser onset) as a function of frequency (x-axis), brain region (row), and rat  
588 (*left/right panels*). Both mPFC and hippocampal theta power were increased during  
589 VMT stimulation. Coherence between mPFC and hippocampal theta rhythms were  
590 reduced or enhanced in a frequency-dependent manner during VMT stimulation.  
591 Magenta lines denote  $p < 0.05$  following Benjamini-Hochberg p-value corrections for two-  
592 sample t-tests between the 6-11Hz range. Data are represented as the mean  $\pm$  s.e.m.

## 593 Discussion

594 Previous research showed that mPFC-hippocampal theta coherence was  
595 stronger when memory was used to guide choices (Jones and Wilson, 2005;  
596 Benchenane et al., 2010; Sigurdsson et al., 2010; O'Neill et al., 2013; Hallock et al.,  
597 2016), but this conclusion required correlating choice outcome with mPFC-hippocampal  
598 theta synchrony. Unlike past work, we manipulated the timing of trial-onset relative to  
599 the strength of mPFC-hippocampal theta synchrony and as such, the detection of  
600 coherence state always preceded choice outcome. Our brain machine interfacing  
601 experiments allowed us to implement various within subject controls and we showed  
602 that trials initiated during states of strong mPFC-hippocampal theta coherence led to  
603 better task performance on two separate paradigms.

604 While we expected this form of long-range theta synchronization to be  
605 particularly useful when spatial working memory was used to guide decision-making, we  
606 also observed that mPFC-hippocampal theta coherence enhanced the performance of a  
607 task that did not require the mPFC, VMT, nor hippocampus for successful performance  
608 (Hallock et al., 2013a; Hallock et al., 2013b, Shaw et al., 2013). These findings raise an  
609 interesting discrepancy - mPFC-hippocampal theta coherence led to improved task  
610 performance on the conditional discrimination task, yet pharmacological inactivation of  
611 these structures did not impair task performance. Given that the conditional  
612 discrimination task is dependent on the dorsal striatum, it is possible that  
613 pharmacological techniques, which work on the scale of minutes, provided time for the  
614 brain to adapt to a disrupted mPFC-hippocampal network. In support of this view,  
615 Goshen and colleagues (2011) showed that optogenetic suppression of the CA1 on a  
616 time-scale similar to pharmacological agents, like muscimol, did not impair the retrieval  
617 of a contextual fear memory. However, when optogenetic inactivation was temporally  
618 specific to the testing phase of the contextual fear memory paradigm, memory retrieval  
619 was disrupted. These findings show that the timescale of inactivation impacts the results  
620 and conclusions drawn from research, raising the possibility that the mPFC-  
621 hippocampal network can indeed be beneficial to the performance of working memory-  
622 independent tasks. Future research should be dedicated to testing the causal link of  
623 mPFC-hippocampal theta synchronization to choice outcome by implementing  
624 procedures similar to what is described here with optogenetic perturbations.

625 To then characterize the neural dynamics co-occurring with strong mPFC-  
626 hippocampal theta coherence events, we tested whether mPFC-thalamic and  
627 hippocampal-thalamic interactions changed with strong and weak mPFC-hippocampal  
628 theta synchronization events. For these analyses, we focused on the ventral midline  
629 thalamus (VMT), a structure that is bidirectionally connected with the mPFC and  
630 hippocampus and supports mPFC-hippocampal neuronal interactions (Vertes, 2002;  
631 McKenna and Vertes, 2004; Vertes et al., 2006; Hoover and Vertes, 2007; Hoover and  
632 Vertes, 2012; Ito et al., 2015; Hallock et al., 2016). Consistent with mPFC-hippocampal  
633 theta coherence reflecting heightened neural coordination across the brain, VMT theta  
634 rhythms showed stronger coherence to mPFC and hippocampal theta rhythms when the  
635 mPFC and hippocampus were strongly coherent. Likewise, optogenetic activation of the  
636 VMT modulated mPFC and hippocampal theta rhythms, while dynamically altering the  
637 way in which these structures were coherent at theta. It should be noted that because  
638 hippocampal theta rhythms were already prominent, the effect of VMT stimulation could  
639 have appeared less dramatic for hippocampal theta relative to mPFC theta.  
640 Nonetheless, our physiological and optogenetic work point towards cortico-thalamic  
641 dialogue as a central component of mPFC-hippocampal theta synchronization.  
642 Importantly, this latter assertion is supported by anatomy, as the mPFC receives no  
643 direct projections from the dorsal hippocampus (Jay and Witter, 1991; Hoover and  
644 Vertes, 2007), but influences hippocampal neuronal activity via the thalamus (Ito et al.,  
645 2015). We suspect that the VMT may coordinate mPFC-hippocampal neural  
646 interactions through cortico-thalamo-cortical looping mechanisms, as the VMT projects  
647 directly to entorhinal cortex neurons that target the CA1 (Wouterlood, 1991) and  
648 modulates CA1 neurons with concurrent cortical activation (Dolleman-Van der Weel,  
649 2017). Consistent with this hypothesis, mediodorsal thalamus is known to sustain mPFC  
650 neuronal activity (Bolkan et al., 2017; Schmitt et al., 2017), and the VMT supports  
651 mPFC firing and mPFC-hippocampal synchronization (Hallock et al., 2016;  
652 Jayachandran, Viena et al., 2023).

653 If mPFC-hippocampal oscillatory synchronization structured cortico-thalamic and  
654 cortico-hippocampal neuronal communication, then we would have expected strong  
655 theta synchronization events to correlate with mPFC spike entrainment to hippocampal  
656 and VMT theta rhythms. When examining all mPFC neurons, we found no differences to  
657 spike-LFP synchronization between strong and weak mPFC-hippocampal theta  
658 coherence events. Instead, we found a rather small increase to the percentage of theta  
659 modulated units in the mPFC. This observation is consistent with recent experimental,  
660 modeling, and theoretical work, implicating coherence as a product of communication,  
661 rather than a scaffold (Schneider et al., 2021; Vinck et al., 2023). For example,  
662 Schneider and colleagues (2021) showed that LFP signal coherence between a sending  
663 and receiving structure can be explained by a sending structures signal power and  
664 strength of projectors and can emerge without changes to spike-entrainment in the  
665 receiving structure. Given that the ventral hippocampus and ventral midline thalamus  
666 are necessary for mPFC-hippocampal theta coherence (O'Neill et al., 2013; Hallock et  
667 al., 2016), we suspect that afferents from these structures contribute significantly to



668 mPFC-hippocampal oscillatory synchronization. When taken together, mPFC-  
669 hippocampal theta coherence events may represent short temporal periods of neural  
670 communication, rather than scaffolding communication. As such, the existing literature  
671 combined with our findings strengthen a claim for using patterns of oscillatory  
672 synchronization in a therapeutic setting.

673 Consistent with our work, a recent study found that inducing states of theta  
674 synchrony between frontal and temporal regions via transcranial alternating-current  
675 stimulation, rescued age-related memory impairments in human participants (Reinhart  
676 and Nguyen, 2019). Our findings suggest that tapping into pre-existing neural dynamics  
677 holds significant promise for improving memory. We hypothesize that non-invasive  
678 stimulation techniques prior to therapy, paired with synchrony-dependent attention or  
679 working memory practice via brain machine interfacing, could pose a viable intervention  
680 to improve cognitive deficits. In closing, the use of brain machine interfacing holds  
681 significant promise for clinical and neuroscientific advance.

## 682 References

- 683 Baddeley, A. (1986). Working Memory. Oxford: Oxford University Press.
- 684 Barnett, L., & Seth, A. K. (2014). The MVGC multivariate Granger causality toolbox: a new approach to  
685 Granger-causal inference. *Journal of neuroscience methods*, 223, 50-68.
- 686 Benchenane, K., Peyrache, A., Khamassi, M., Tierney, P. L., Gioanni, Y., Battaglia, F. P., & Wiener, S. I.  
687 (2010). Coherent theta oscillations and reorganization of spike timing in the hippocampal-  
688 prefrontal network upon learning. *Neuron*, 66(6), 921-936.
- 689 Bolkan, S. S., Stujenske, J. M., Parnaudeau, S., Spellman, T. J., Rauffenbart, C., Abbas, A. I., ... &  
690 Kellendonk, C. (2017). Thalamic projections sustain prefrontal activity during working memory  
691 maintenance. *Nature neuroscience*, 20(7), 987-996.
- 692 Buzsaki, G. (2006). Rhythms of the Brain. Oxford university press.
- 693 Bygrave, A. M., Jahans-Price, T., Wolff, A. R., Sprengel, R., Kullmann, D. M., Bannerman, D. M., &  
694 Kätzel, D. (2019). Hippocampal–prefrontal coherence mediates working memory and selective  
695 attention at distinct frequency bands and provides a causal link between schizophrenia and its  
696 risk gene GRIA1. *Translational psychiatry*, 9(1), 142.
- 697 Christophel, T. B., Klink, P. C., Spitzer, B., Roelfsema, P. R., & Haynes, J. D. (2017). The distributed  
698 nature of working memory. *Trends in cognitive sciences*, 21(2), 111-124.
- 699 Churchwell, J. C., & Kesner, R. P. (2011). Hippocampal-prefrontal dynamics in spatial working memory:  
700 interactions and independent parallel processing. *Behavioural brain research*, 225(2), 389-395.
- 701 Cohen, M. X. (2014). Analyzing neural time series data: theory and practice. MIT press.
- 702 Cohen, M. X. (2017). MATLAB for brain and cognitive scientists. MIT Press.
- 703 Colgin, L. L. (2011). Oscillations and hippocampal–prefrontal synchrony. *Current opinion in neurobiology*,  
704 21(3), 467-474.

- 705 Dolleman-Van der Weel, M. J., Lopes da Silva, F. H., & Witter, M. P. (2017). Interaction of nucleus  
706 reuniens and entorhinal cortex projections in hippocampal field CA1 of the rat. *Brain Structure*  
707 *and Function*, 222, 2421-2438.
- 708 Dolleman-van der Weel, M. J., Griffin, A. L., Ito, H. T., Shapiro, M. L., Witter, M. P., Vertes, R. P., & Allen,  
709 T. A. (2019). The nucleus reuniens of the thalamus sits at the nexus of a hippocampus and  
710 medial prefrontal cortex circuit enabling memory and behavior. *Learning & Memory*, 26(7), 191-  
711 205.
- 712 Dudchenko, P. A., Wood, E. R., & Eichenbaum, H. (2000). Neurotoxic hippocampal lesions have no effect  
713 on odor span and little effect on odor recognition memory but produce significant impairments on  
714 spatial span, recognition, and alternation. *Journal of Neuroscience*, 20(8), 2964-2977. Dudchenko,  
715 P. A. (2004). An overview of the tasks used to test working memory in rodents. *Neuroscience &*  
716 *Biobehavioral Reviews*, 28(7), 699-709.
- 717 Dudchenko, P. A. (2004). An overview of the tasks used to test working memory in rodents. *Neuroscience*  
718 *& Biobehavioral Reviews*, 28(7), 699-709.
- 719 Eichenbaum, H. (2008). *Learning & memory* (p. 494). New York: WW Norton & Company.
- 720 Eichenbaum, H. (2017). Prefrontal–hippocampal interactions in episodic memory. *Nature Reviews*  
721 *Neuroscience*, 18(9), 547-558.
- 722 Elvsåshagen, T., Shadrin, A., Frei, O., van der Meer, D., Bahrami, S., Kumar, V. J., ... & Kaufmann, T.  
723 (2021). The genetic architecture of the human thalamus and its overlap with ten common brain  
724 disorders. *Nature communications*, 12(1), 2909.
- 725 Fell, J., & Axmacher, N. (2011). The role of phase synchronization in memory processes. *Nature reviews*  
726 *neuroscience*, 12(2), 105-118.
- 727 Fries, P. (2005). A mechanism for cognitive dynamics: neuronal communication through neuronal  
728 coherence. *Trends in cognitive sciences*, 9(10), 474-480.
- 729 Fries, P. (2015). Rhythms for cognition: communication through coherence. *Neuron*, 88(1), 220-235.
- 730 Gabbott, P. L., Warner, T. A., Jays, P. R., Salway, P., & Busby, S. J. (2005). Prefrontal cortex in the rat:  
731 projections to subcortical autonomic, motor, and limbic centers. *Journal of Comparative*  
732 *Neurology*, 492(2), 145-177.
- 733 Goldman-Rakic, P. S. (1991). Cellular and circuit basis of working memory in prefrontal cortex of  
734 nonhuman primates. *Progress in brain research*, 85, 325-336.
- 735 Goshen, I., Brodsky, M., Prakash, R., Wallace, J., Gradinaru, V., Ramakrishnan, C., & Deisseroth, K.  
736 (2011). Dynamics of retrieval strategies for remote memories. *Cell*, 147(3), 678-689.
- 737 Griffin, A. L. (2021). The nucleus reuniens orchestrates prefrontal-hippocampal synchrony during spatial  
738 working memory. *Neuroscience & Biobehavioral Reviews*, 128, 415-420.
- 739 Guise, K. G., & Shapiro, M. L. (2017). Medial prefrontal cortex reduces memory interference by modifying  
740 hippocampal encoding. *Neuron*, 94(1), 183-192.
- 741 Hallock, H. L., Arreola, A. C., Shaw, C. L., & Griffin, A. L. (2013a). Dissociable roles of the dorsal striatum  
742 and dorsal hippocampus in conditional discrimination and spatial alternation T-maze tasks.  
743 *Neurobiology of learning and memory*, 100, 108-116.

- 744 Hallock, H. L., Wang, A., Shaw, C. L., & Griffin, A. L. (2013b). Transient inactivation of the thalamic  
745 nucleus reuniens and rhomboid nucleus produces deficits of a working-memory dependent  
746 tactile-visual conditional discrimination task. *Behavioral neuroscience*, 127(6), 860.
- 747 Hallock, H. L., Wang, A., & Griffin, A. L. (2016). Ventral midline thalamus is critical for hippocampal–  
748 prefrontal synchrony and spatial working memory. *Journal of Neuroscience*, 36(32), 8372-8389.
- 749 Hoover, W. B., & Vertes, R. P. (2007). Anatomical analysis of afferent projections to the medial prefrontal  
750 cortex in the rat. *Brain Structure and Function*, 212, 149-179.
- 751 Hoover, W. B., & Vertes, R. P. (2012). Collateral projections from nucleus reuniens of thalamus to  
752 hippocampus and medial prefrontal cortex in the rat: a single and double retrograde fluorescent  
753 labeling study. *Brain Structure and Function*, 217, 191-209.
- 754 Horst, N. K., & Laubach, M. (2009). The role of rat dorsomedial prefrontal cortex in spatial working  
755 memory. *Neuroscience*, 164(2), 444-456.
- 756 Hyman, J. M., Zilli, E. A., Paley, A. M., & Hasselmo, M. E. (2010). Working memory performance  
757 correlates with prefrontal-hippocampal theta interactions but not with prefrontal neuron firing  
758 rates. *Frontiers in integrative neuroscience*, 2.
- 759 Ito, H. T., Zhang, S. J., Witter, M. P., Moser, E. I., & Moser, M. B. (2015). A prefrontal–thalamo–  
760 hippocampal circuit for goal-directed spatial navigation. *Nature*, 522(7554), 50-55.
- 761 Ito, H. T., Moser, E. I., & Moser, M. B. (2018). Supramammillary nucleus modulates spike-time  
762 coordination in the prefrontal-thalamo-hippocampal circuit during navigation. *Neuron*, 99(3), 576-  
763 587.
- 764 Janabi-Sharifi, F., Hayward, V., & Chen, C. S. (2000). Discrete-time adaptive windowing for velocity  
765 estimation. *IEEE Transactions on control systems technology*, 8(6), 1003-1009.
- 766 Jay, T. M., & Witter, M. P. (1991). Distribution of hippocampal CA1 and subicular efferents in the  
767 prefrontal cortex of the rat studied by means of anterograde transport of Phaseolus  
768 vulgaris-leucoagglutinin. *Journal of Comparative Neurology*, 313(4), 574-586.
- 769 Jayachandran, M., Viena, T. D., Garcia, A., Veliz, A. V., Leyva, S., Roldan, V., ... & Allen, T. A. (2023).  
770 Nucleus reuniens transiently synchronizes memory networks at beta frequencies. *Nature*  
771 *Communications*, 14(1), 4326.
- 772 Jones, M. W., & Wilson, M. A. (2005). Theta rhythms coordinate hippocampal–prefrontal interactions in a  
773 spatial memory task. *PLoS biology*, 3(12), e402.
- 774 Jutras, M. J., Fries, P., & Buffalo, E. A. (2009). Gamma-band synchronization in the macaque  
775 hippocampus and memory formation. *Journal of Neuroscience*, 29(40), 12521-12531.
- 776 Kropff, E., Carmichael, J. E., Moser, E. I., & Moser, M. B. (2021). Frequency of theta rhythm is controlled  
777 by acceleration, but not speed, in running rats. *Neuron*, 109(6), 1029-1039.
- 778 Lee, I., & Kesner, R. P. (2003). Time-dependent relationship between the dorsal hippocampus and the  
779 prefrontal cortex in spatial memory. *Journal of Neuroscience*, 23(4), 1517-1523.
- 780 Lugtmeijer, S., Geerligs, L., De Leeuw, F. E., De Haan, E. H., & Kessels, R. P. (2021). Are visual working  
781 memory and episodic memory distinct processes? Insight from stroke patients by lesion-symptom  
782 mapping. *Brain Structure and Function*, 226(6), 1713-1726.

- 783 Maisson, D. J. N., Gemzik, Z. M., & Griffin, A. L. (2018). Optogenetic suppression of the nucleus reuniens  
784 selectively impairs encoding during spatial working memory. *Neurobiology of Learning and*  
785 *Memory*, 155, 78-85.
- 786 McKenna, J. T., & Vertes, R. P. (2004). Afferent projections to nucleus reuniens of the thalamus. *Journal*  
787 *of comparative neurology*, 480(2), 115-142.
- 788 Mitra, P. (2007). *Observed brain dynamics*. Oxford University Press.
- 789 O'Keefe, J., & Recce, M. L. (1993). Phase relationship between hippocampal place units and the EEG  
790 theta rhythm. *Hippocampus*, 3(3), 317-330.
- 791 O'Neill, P. K., Gordon, J. A., & Sigurdsson, T. (2013). Theta oscillations in the medial prefrontal cortex are  
792 modulated by spatial working memory and synchronize with the hippocampus through its ventral  
793 subregion. *Journal of Neuroscience*, 33(35), 14211-14224.
- 794 Papale, A. E., Stott, J. J., Powell, N. J., Regier, P. S., & Redish, A. D. (2012). Interactions between  
795 deliberation and delay-discounting in rats. *Cognitive, Affective, & Behavioral Neuroscience*, 12(3),  
796 513-526.
- 797 Paxinos, G., & Watson, C. (2006). *The rat brain in stereotaxic coordinates: hard cover edition*. Elsevier.
- 798 Qasim, S. E., Fried, I., & Jacobs, J. (2021). Phase precession in the human hippocampus and entorhinal  
799 cortex. *Cell*, 184(12), 3242-3255.
- 800 Ranck Jr, J. B. (1973). Studies on single neurons in dorsal hippocampal formation and septum in  
801 unrestrained rats: Part I. Behavioral correlates and firing repertoires. *Experimental neurology*,  
802 41(2), 462-531.
- 803 Redish, A. D. (2016). Vicarious trial and error. *Nature Reviews Neuroscience*, 17(3), 147-159.
- 804 Reinhart, R. M., & Nguyen, J. A. (2019). Working memory revived in older adults by synchronizing  
805 rhythmic brain circuits. *Nature neuroscience*, 22(5), 820-827.
- 806 Sarnthein, J., Petsche, H., Rappelsberger, P., Shaw, G. L., & Von Stein, A. (1998). Synchronization  
807 between prefrontal and posterior association cortex during human working memory. *Proceedings*  
808 *of the National Academy of Sciences*, 95(12), 7092-7096.
- 809 Schmitt, L. I., Wimmer, R. D., Nakajima, M., Happ, M., Mofakham, S., & Halassa, M. M. (2017). Thalamic  
810 amplification of cortical connectivity sustains attentional control. *Nature*, 545(7653), 219-223.
- 811 Schneider, M., Broggin, A. C., Dann, B., Tzanou, A., Uran, C., Sheshadri, S., ... & Vinck, M. (2021). A  
812 mechanism for inter-areal coherence through communication based on connectivity and  
813 oscillatory power. *Neuron*, 109(24), 4050-4067.
- 814 Sesack, S. R., Deutch, A. Y., Roth, R. H., & Bunney, B. S. (1989). Topographical organization of the  
815 efferent projections of the medial prefrontal cortex in the rat: an anterograde tract-tracing study  
816 with Phaseolus vulgaris leucoagglutinin. *Journal of Comparative Neurology*, 290(2), 213-242.
- 817 Shaw, C. L., Watson, G. D., Hallock, H. L., Cline, K. M., & Griffin, A. L. (2013). The role of the medial  
818 prefrontal cortex in the acquisition, retention, and reversal of a tactile visuospatial conditional  
819 discrimination task. *Behavioural brain research*, 236, 94-101.
- 820 Siapas, A. G., Lubenov, E. V., & Wilson, M. A. (2005). Prefrontal phase locking to hippocampal theta  
821 oscillations. *Neuron*, 46(1), 141-151.

- 822 Sigurdsson, T., Stark, K. L., Karayiorgou, M., Gogos, J. A., & Gordon, J. A. (2010). Impaired  
823 hippocampal–prefrontal synchrony in a genetic mouse model of schizophrenia. *Nature*,  
824 464(7289), 763-767.
- 825 Spellman, T., Rigotti, M., Ahmari, S. E., Fusi, S., Gogos, J. A., & Gordon, J. A. (2015). Hippocampal–  
826 prefrontal input supports spatial encoding in working memory. *Nature*, 522(7556), 309-314.
- 827 Stout, J. J., & Griffin, A. L. (2020). Representations of on-going behavior and future actions during a  
828 spatial working memory task by a high firing-rate population of medial prefrontal cortex neurons.  
829 *Frontiers in Behavioral Neuroscience*, 14, 151.
- 830 Vertes, R. P. (2002). Analysis of projections from the medial prefrontal cortex to the thalamus in the rat,  
831 with emphasis on nucleus reuniens. *Journal of comparative neurology*, 442(2), 163-187.
- 832 Vertes, R. P., Hoover, W. B., Do Valle, A. C., Sherman, A., & Rodriguez, J. J. (2006). Efferent projections  
833 of reuniens and rhomboid nuclei of the thalamus in the rat. *Journal of comparative neurology*,  
834 499(5), 768-796.
- 835 Vinck, M., Uran, C., Spyropoulos, G., Onorato, I., Broggin, A. C., Schneider, M., & Canales-Johnson, A.  
836 (2023). Principles of large-scale neural interactions. *Neuron*, 111(7), 987-1002.
- 837 Wang, G. W., & Cai, J. X. (2006). Disconnection of the hippocampal–prefrontal cortical circuits impairs  
838 spatial working memory performance in rats. *Behavioural brain research*, 175(2), 329-336.
- 839 Winter, Y., & Stich, K. P. (2005). Foraging in a complex naturalistic environment: capacity of spatial  
840 working memory in flower bats. *Journal of Experimental Biology*, 208(3), 539-548.
- 841 Wouterlood, F. G. (1991). Innervation of entorhinal principal cells by neurons of the nucleus reuniens  
842 thalami. Anterograde PHA-L tracing combined with retrograde fluorescent tracing and intracellular  
843 injection with Lucifer Yellow in the rat. *European Journal of Neuroscience*, 3(7), 641-647.

## 844 Acknowledgements

845 We would like to thank A. Garcia for initial optimization of brain machine interfacing, as  
846 well as Z. Gemzik, H. Rosenblum, D. Shaw, A. Cestone, J. Hoopman, E. Walzl, J.  
847 Mace, and S. Adiraju for technical assistance. The brain cartoons were created by W.  
848 Tang. The rat cartoons were created by G. Costa. Both images were downloaded from  
849 SciDraw.io. We would like to thank Sylvain Le Marchand for capturing images of viral  
850 expression for the optogenetics experiments and we would also like to thank M.  
851 Stanton, W. Kenkel, and T. Vickery for feedback on the experiments and early versions  
852 of the manuscript. This work was made possible by the Office of Laboratory Medicine.  
853 We thank the staff at Neuralynx for technical support. Research was funded by the  
854 National Institute of Mental Health under R21 MH117687.

## 855 Data Availability Statement

856 Data and MATLAB code to reproduce the figures and statistics in this manuscript can  
857 be found on figshare (10.6084/m9.figshare.24599616) and Github. A small portion of



858 data for brain machine interfacing parameter decisions were generated using signals  
859 detected in real-time and are not available (**Extended Fig. 2**).

## 860 Author Contributions

861 A.L.G proposed the brain machine interfacing experiments. A.L.G., J.J.S., and A.E.G.  
862 modified and extended upon the proposed experiments. J.J.S developed the brain  
863 machine interfacing methods and wrote the code. J.J.S., A.E.G., and S.K. contributed to  
864 data collection. J.J.S. and H.L.H. collected data used from previous publications. J.J.S.  
865 analyzed the data. All authors contributed to the writing of this manuscript.

## 866 Competing interests

867 The authors declare no competing interests.

## 868 Methods

### 869 Subjects

870 Subjects were 20 adult (>postnatal day 90) Long Evans Hooded rats. For  
871 experiment #1 (**Figs 1-3**), there were 4 adult male and 4 adult female rats with  
872 simultaneous mPFC and hippocampus local field potential (LFP) recordings. For the  
873 conditional discrimination experiment (**Fig. 4**), 3 adult rats (2 female, 1 male) were  
874 implanted with wires targeting the mPFC and hippocampus. In the analyses from **Fig. 5**  
875 **and Extended Fig. 6**, there were 6 adult male rats, 3 receiving mPFC-VMT-  
876 hippocampus recordings, and 3 receiving mPFC/hippocampus recordings (rats were  
877 from Stout and Griffin, 2020 and Hallock et al., 2016, respectively). For the optogenetic  
878 experiment (**Fig. 6**), 3 male rats received optogenetic virus injections and fiber  
879 placement targeting the VMT (2 with simultaneous mPFC/hippocampus recordings and  
880 1 with silicon probe recording from the mPFC). Each rat was placed on mild food  
881 restriction (3-4 pellets for females, 4-5 pellets for males) to maintain ~85-90% *ad libitum*  
882 body weight. Rats maintained a 12hr light/dark cycle in a humidity controlled colony  
883 room. Experimentation was performed during the light cycle (8am-5pm) at  
884 approximately the same time each day +/- ~1 hour.

### 885 Automated T-maze

886 The automated maze was in the shape of a figure 8 (**Fig. 1A and Extended Fig.**  
887 **1**) and was purchased from MazeEngineers. The total width of the maze was 136.5cm  
888 and the total length was 74.8cm. Floor width corresponded to ~12.7cm, while wall



889 height was ~20.3cm. The delay zone was a rectangular shape, 12.7cm wide and  
890 32.7cm long. Doors were pneumatically controlled via a silent air compressor (SilentAire  
891 Super Silent 30-TC), reward delivery (45mg bio-serv chocolate pellets) was controlled  
892 through an automated pellet dispenser, and both were under the control of Arduino  
893 powered infrared beams (Adafruit) via custom MATLAB programming (**Extended Fig.**  
894 **1**). Walls were placed on the exterior of the maze with distinct visual cues on the left  
895 and right choice arms. For two rats on delayed alternation, interior walls were placed to  
896 improve maze running behavior. These walls were kept in place for the conditional  
897 discrimination task. In the delay zone, the south facing wall was lowered on the delayed  
898 alternation task, but was kept in place for the conditional discrimination task. The maze  
899 was surrounded by black curtains with visual cues matching the maze and  
900 experimentation occurred in a dimly lit room.

## 901 Brain machine interface

902 The brain machine interface relied upon extracting real-time LFPs, performing  
903 coherence analysis, and triggering the choice point door to open according to the  
904 magnitude of prefrontal-hippocampal theta coherence. Real time signal extraction was  
905 performed using the Neuralynx Netcom v3.1.0 package code (*NlxGetNewCSCData.m*).  
906 Since signals were extracted serially, this code was modified in-house  
907 (*NlxGetNewCSCData\_2signals.m*) and verified by feeding the same recording lead  
908 through two separate recorded channels (**Extended Fig. 2C**). By iteratively extracting  
909 signals into MATLAB from the Neuralynx acquisition system at systematically-increasing  
910 lags (25ms-300ms), we found that waiting 250ms before extracting new signals  
911 provided reliable streaming between the brain and MATLAB (**Extended Fig. 2A-C**). We  
912 then tested the impact of dataset sizes on the strength and the shape of the coherence  
913 distribution within the 4-12Hz range, in real time (*mscohere.m*, *frequency range =*  
914 *1:0.5:20*). By linearly increasing the amount of data being analyzed, and calculating  
915 coherence over 50 separate intervals from an example rat in real-time, we noticed that  
916 the dataset sizes strongly impacted the shape of the coherence distribution (**Extended**  
917 **Fig. 2D-F**), although the effect on coherence magnitude was less robust (**Extended**  
918 **Fig. 2E**). Since the strongest frequency (4-12Hz) plateaued at ~8Hz when analyzing  
919 dataset sizes of 1.25s (**Extended Fig. 2F**), we chose to use 1.25s dataset sizes with  
920 250ms steps forward in time (**Extended Fig. 2G**). In practice, sampling windows were  
921 typically ~1.28s with ~280ms overlap and yielded stable coherence estimates across  
922 epochs (**Extended Fig. 2G**). “Theta coherence” was then defined as 6-11Hz synchrony  
923 according to the frequency x coherence plot (**Fig. 1B**). This approach led to clear  
924 transitions between high and low magnitude theta coherence (**Extended Fig. 2H**)  
925 indicating that we were accurately tracking coherence in real time. Since brain machine  
926 interfacing handles data acquired in real time, multiple procedures were taken to lower  
927 the incidence of signal artifact being used in brain machine interfacing trials. First, real-  
928 time LFPs were detrended by subtracting a third-degree polynomial (*detrend.m*). Then,  
929 using a mean and standard-deviation calculated over a 10-minute recording session

930 that occurred prior to brain machine interfacing experimentation, LFPs were z-score  
931 transformed in real-time. During brain machine interfacing experimentation, real-time  
932 detrended LFPs were excluded if >1% of the LFPs were saturated with voltages  
933 exceeding 4 standard deviations from the mean. Since movement related artifacts often  
934 coincided with strong delta (1-4Hz) power (**Extended Fig. 2I**), we also excluded epochs  
935 if delta coherence was stronger than theta coherence. When combined, these  
936 approaches isolated coherence distributions with clear theta synchrony (6-11Hz; **Fig.**  
937 **1B**) and high consistency across rats (**Extended Fig. 2I-J**).

938

## 939 Behavior and experimentation

940 Rats were handled for 5 days in the experimentation room with the lights on and  
941 placed on mild food restriction prior to habituation to the automated T-maze. Habituation  
942 consisted of “goal-box” training and “forced-runs” training. For goal-box training, rats  
943 were placed near the reward dispensers for 3 minutes and were required to eat all  
944 pellets within 90s for 6 trials (3 left dispenser / 3 right dispenser). One rat was excluded  
945 after not passing goal box training for 7 consecutive days. For forced-runs, rats  
946 traversed the maze to receive a reward at the reward dispenser and were required to  
947 eat all rewards for at least 1 day. Rats were often run for multiple forced runs days. In  
948 between traversals, rats waited in the delay pedestal. After maze habituation, rats were  
949 trained to perform the continuous alternation (CA) task, where choice alternations were  
950 reinforced with chocolate pellets. The CA task was performed 5 days/week for 30min or  
951 40 trials. Rats were required to perform at 80% accuracy for two consecutive days  
952 before and after surgery. After surgical recovery, rats were re-handled for 5 days, then  
953 placed on the CA task until they again reached criterion. The CA task was implemented  
954 to ensure that coherence-contingent choice outcomes (see **Brain machine interface**)  
955 were not confounded by alternation rule acquisition. Rats were then exposed to the  
956 spatial working memory delayed alternation (DA) task, where in between choice  
957 alternations, rats waited in the delay zone for a 5-30s delay period (randomly  
958 distributed). Once rats performed the DA task for 2 consecutive days at 70% accuracy,  
959 our brain machine interface testing occurred. DA task training was implemented to rule-  
960 out any effect of changing environmental demands on the rats (e.g. the introduction of a  
961 delay period), as well as to normalize task performance prior to experimentation. During  
962 testing, the experimenter was blinded to trial-type and trials were excluded if  
963 unexpected events occurred before the choice (e.g. loud noises, fear behavior, twisted  
964 recording tether) then saved as a MATLAB variable after the session ended. 20% of  
965 trials were experimental (10% high coherence/10% low coherence), while 80% of trials  
966 were controls (**Fig. 2A**). Trial-types were presented pseudo-randomly because high and  
967 low coherence trials were required to be presented prior to delay matched control trials.  
968 Within blocks of 10 trials, 2 were experimental, 2 were delay matched controls, and 6  
969 were random delays. On a given experimental trial, if rats did not breach the coherence

970 threshold, the trial was initiated after 30s, and the delay matched control trial was  
971 replaced with a random delay. After data collection, LFPs were visualized from trials  
972 and trials were marked for exclusion if signal artifacts were present.

973 For the conditional discrimination experiment, pre-training procedures were  
974 similar to what is described above. Rats were randomly assigned to wood-left/mesh-  
975 right or wood-right/mesh-left contingencies. Forced runs training (5 days) included the  
976 wood/mesh floor inserts. After recovery from surgery, rats began conditional  
977 discrimination training, where a floor insert type dictated the turn direction at the choice  
978 (e.g. wood floor insert may require a left turn for a reward). Unlike the delayed  
979 alternation experiment, brain machine interfacing began on day 1 of conditional  
980 discrimination training to ensure adequate data collection (i.e. it was unclear as to how  
981 fast rats could acquire this task on the automatic maze). Data were included for analysis  
982 once rats reached a criterion of 70% for two consecutive days. The conditional  
983 discrimination task was initially designed such that a random sequence of trials was  
984 generated where no more than 3 same-turn directions were rewarded, and so that rats  
985 could not receive reward from alternation >60% of the time. Later in data collection, this  
986 alternation criterion was lowered to 45% to improve conditional discrimination  
987 acquisition. Analysis required that rats performed >70%, alternated <70% of the time,  
988 and contributed at least 3 trials to a session. Unlike the delayed alternation dataset,  
989 which included high and low coherence trials, the conditional discrimination experiment  
990 focused on high coherence trials. The distribution of trial-types were as such; 40% high  
991 coherence, 40% yoked control (identical delay duration as high coherence trials), and  
992 20% random delay trials. Trial types were distributed in blocks of 10 trials so that  
993 corresponding yoked control trials would follow closely to high coherence trials. Per  
994 each session, 60% of trials were not controlled by the brain. A trial was initiated if rats  
995 did not reach high coherence threshold after 20s, but rats were required to wait in the  
996 delay-zone for ~3.5-5s to segment trials. A computer monitor was placed in the room  
997 with the experimenter which provided trial-by-trial instructions (i.e. trial 1: wood-left, trial  
998 2: mesh-right, etc...). This monitor was also used to monitor LFP data in real-time, but  
999 the experimenter remained blinded to trial-type. Trials were marked for exclusion if  
1000 unexpected events occurred before the choice.

1001 With respect to data used from Hallock et al., 2016 (N = 3 rats) and Stout and  
1002 Griffin, 2020 (N = 3 rats), 6 rats were trained to perform a delayed alternation task  
1003 (Hallock et al., 2016) or delayed non-match to position task (Stout and Griffin, 2020) to  
1004 80% criterion for two consecutive days. With respect to the delayed alternation task,  
1005 sessions were included if performance was >75% because rats switched between  
1006 performing the delayed alternation task and the conditional discrimination task. Unlike  
1007 the brain machine interfacing experiment where delays varied between 5 and 30s, rats  
1008 from Hallock and colleagues (2016) had predictable delay durations of 30s. With  
1009 respect to the delayed non-match to position task, sessions were included if  
1010 performance was >80% (Stout and Griffin, 2020). This task differs from delayed  
1011 alteration in that each trial is comprised of a sample phase, where rats are forced to

1012 navigate towards the left or right reward zone, followed by a free choice. Rats were  
1013 rewarded if their choice was an alternation from the sample phase. Sample phase turn  
1014 directions were pseudo-randomized to ensure there were no more than 3 same-turn  
1015 directions in a row. Data were extracted from delay periods, which separated the  
1016 sample from choice phase and were 20s in duration. From choice to sample, there was  
1017 an intertrial interval of 40s.

## 1018 Surgery

1019 Isoflurane (1-4%) anesthetic was used prior to shaving the scalp and placing rats  
1020 in the stereotaxic instrument (Kopf). Puralube was applied to rats' eyes throughout the  
1021 surgery. Lidocaine was injected subcutaneously in the scalp, the scalp was sterilized  
1022 using Chlorhexidine solution (0.2% chlorhexidine gluconate), then incised if rats did not  
1023 exhibit a kick reflex and eye blink reflex. Bleeding was controlled using hydrogen  
1024 peroxide. Once the skull was level, bregma was identified, and craniotomies were made  
1025 above the medial prefrontal cortex (mPFC) and dorsal hippocampus (dHPC). mPFC  
1026 craniotomies were made at + 3.1mm anterior and +/- 1.0mm lateral to bregma, while  
1027 dHPC craniotomies were made at -3.7mm posterior and +/- 2.2mm lateral to bregma.  
1028 Implants were always on the same hemisphere, but hemispheres were decided pseudo-  
1029 randomly for each rat in a sex matched manner. For the delayed alternation brain  
1030 machine interfacing experiment, 3 right hemisphere (2 female, 1 male) and 5 left  
1031 hemisphere (2 female, 3 male) implants were successful. 6 rats received cannula  
1032 implants targeting the contralateral ventral midline thalamus and 1 rat received  
1033 electrode implants targeting the contralateral striatum for separate experiments that  
1034 occurred after the data collected in this report. For the conditional discrimination brain  
1035 machine interfacing experiment, all 3 successful implants were in the right hemisphere.  
1036 One rat received a 64 channel silicon probe implant (Buzsaki 64L, Neuronexus) at  
1037 3.7mm anterior to bregma and 0.7mm lateral. A small burr hole was made over the  
1038 cerebellum for reference wire implants at -10 to -12mm posterior and +/- ~1.5mm lateral  
1039 to bregma. 5-6 bone screws (Fine Science Tools) were implanted as support screws,  
1040 and 1-2 bone screws were implanted over the cerebellum for grounding. LFP implants  
1041 were mounted to the skull using Metabond and the remainder of the micro-drive was  
1042 mounted using dental acrylic (Lang Dental). A shield surrounding the electronic  
1043 interface board was built using a plastic medicine cup or a copper mesh shielding.  
1044 Copper mesh shielding was grounded to the same screw grounding the electronic  
1045 interface board. Rats were given a dose of flunixin (Banamine; 2.5 mg/kg) at least 20  
1046 minutes prior to removal from anesthesia and were placed on ~15mg Childrens  
1047 Ibuprofen for a 7-day recovery.

1048 For optogenetic infusions (AAV5-hSyn-ChR2-eYFP) and fiber implants, rat #3  
1049 and rat #1 received viral injections at 1.8mm, 2.4mm, and 3mm posterior to bregma.  
1050 Posterior injections of 2.4mm and 3mm were injected at 2.2mm lateral and 7.1mm  
1051 ventral to brain surface at a 15 degree angle. The injection at 1.8mm posterior to

1052 bregma was injected at 2.2mm lateral to bregma and 6.6mm ventral to brain surface at  
1053 a 15 degree angle. Once the microsyringe was placed into the brain, it sat for 10  
1054 minutes, after which, an injection of .1uL/min was performed for 2.5min at each location.  
1055 The fiber was placed at 2.4mm posterior to bregma, 2.2mm lateral to bregma, and  
1056 6.8mm ventral to brain surface from the opposite hemisphere. pAAV-hSyn-  
1057 hChR2(H134R)-EYFP was a gift from Karl Deisseroth (Addgene plasmid # 26973;  
1058 <http://n2t.net/addgene:26973>; RRID:Addgene 26973).

1059 Rat #2 received two separate injections at 1.9mm posterior to bregma and  
1060 1.95mm lateral to bregma. The microsyringe was placed at 7mm ventral to brain  
1061 surface, allowed to settle for 10 minutes, after which a 2.5 minute injection took place at  
1062 .1uL/min. Once the injection was complete, the microsyringe was slowly raised dorsally  
1063 to 6.7mm ventral to brain surface, and another injection of 2.5uL occurred. The fiber  
1064 was then placed at 6.4mm from brain surface from the opposite hemisphere.

## 1065 Perfusion and histology

1066 Rats were sacrificed with a lethal dose of sodium pentobarbital, then perfused  
1067 with phosphate buffered saline (PBS) and 4% paraformaldehyde (PFA). After at least 2  
1068 days of post-fixing the implant and brain in 4% PFA, brains were extracted, then cryo-  
1069 protected in 4% PFA and 30% sucrose (sucrose-PFA). After 1-2weeks, or when brains  
1070 sunk to the bottom of the vial, brains were sectioned at 30-50 $\mu$ m. For implant  
1071 verification, sections were cresyl stained and imaged with a digital microscope  
1072 (plugable). To verify viral expression in the optogenetic experiment, sections were  
1073 gently washed in PBS, covered with ProLong Diamond with DAPI (Life-Technologies),  
1074 cover-slipped, then imaged with the Leica Stellaris 8 (supported by NIST  
1075 70NANB21H085).

## 1076 Electrophysiological recordings

1077 LFPs were recorded on a Neuralynx (Digital Lynx) 64 channel recording system.  
1078 Neuralynx software (Cheetah) was used to sample LFPs at 2kHz, and filter LFPs  
1079 between 1-600Hz. mPFC LFP implants consisted of two stainless steel wires, while  
1080 dHPC implants consisted of 4 stainless steel wires, each offset dorso-ventrally by  
1081 ~0.25-0.5mm. Single units were collected using tetrodes and reported in previous  
1082 publications (Hallock et al., 2016; Stout and Griffin, 2020). Spikes were sampled at  
1083 32kHz, bandpass filtered between 0.6-6kHz, and thresholded at 50-75uV. Clusters were  
1084 cut using SpikeSort3D with KlustaKwik, then manually curated. Putative pyramidal  
1085 neurons were selected based on spike waveform and interspike-intervals (Ranck,  
1086 1973).



## 1087 Granger Prediction

1088 All follow-up spectral analyses were performed on data that was inspected for  
1089 break-through artifacts. Bivariate Granger prediction was used to assess directionality  
1090 between PFC and HPC LFPs (code from Hallock et al., 2016). Granger prediction is  
1091 calculated using the variance in errors obtained from univariate and bivariate  
1092 autoregressions on lagged LFPs. As reported by Cohen (2014):

1093 
$$\text{Univariate: } PFC_t = \sum_{n=1}^k a_n PFC_{t-n} + e_t$$

1094

1095 
$$\text{Bivariate: } PFC_t = \sum_{n=1}^k a_n PFC_{t-n} + \sum_{n=1}^k b_n HPC_{t-n} + \epsilon_t$$

1096 For each model,  $t$  reflects the time point for the LFP data,  $k$  reflects the model order,  $n$   
1097 reflects the lag,  $e$  represents the variance not explained by a univariate model, while  $\epsilon$   
1098 reflects the variance not explained by the bivariate model. Granger prediction in the  
1099 HPC-to-PFC direction is estimated as such:

$$GC_{HPC \rightarrow PFC} = \log \left( \frac{\text{Var}[e]}{\text{Var}[\epsilon]} \right)$$

1100 Spectral estimates are calculated using Geweke's method in both directions (e.g.  
1101 PFC-to-HPC and HPC-to-PFC). Bayes Information Criterion (BIC) was used to estimate  
1102 model order for each signal and was defined as the lag providing the smallest BIC value  
1103 (up to 20 lags). The averaged BIC value across all signals was then rounded and  
1104 applied to each signal for granger prediction analysis. For multivariate granger  
1105 prediction analysis, we used the freely available MVGC toolbox (Barnett and Seth,  
1106 2014) downloaded from Github. The information criterion and VAR model estimation  
1107 mode was set to Lowess Regression ('LWR') and BIC was estimated by testing model  
1108 orders up to 100 lags with an autocovariance lag of 1000. The same BIC value was  
1109 used for all signals, as described above. Demeaned signals were fit to a VAR model  
1110 (*tsdata\_to\_var.m*), the autocovariance sequence was estimated (*var\_to\_autocov.m*) and  
1111 the VAR model was checked for potential error, such as violations to stationarity.  
1112 Finally, the spectral pairwise causality estimations were calculated (*var\_to\_spwgc.m*).  
1113 Granger prediction and model order estimation was performed on signals of identical  
1114 size (1.25s) for both high and low coherence epochs. Code is available on the labs  
1115 Github page (*get\_mvgc\_parameters.m*, *get\_mvgc\_modelOrder.m*,  
1116 *get\_mvgc\_freqGranger.m*).

## 1117 Spectral power

1118 Power spectral densities were estimated using the chronux toolbox (Mitra, 2007)  
1119 *mtspectrumc* using 3 tapers with a time-bandwidth product of 2 and *pspectrum.m*. To  
1120 account for the 1/f power law, power spectral estimates were log10 transformed. The

1121 frequency corresponding to maximum theta power was defined as “theta frequency” and  
1122 performed over the 4-12Hz frequency range.

## 1123 Spike-LFP analyses

1124 Analysis of entrainment was performed over the entire task recording to  
1125 maximize spike counts. High and low mPFC-hippocampal theta coherence thresholds  
1126 were determined (see above), then high and low coherence epochs were extracted for  
1127 each session. Two procedures were implemented for the removal of epochs saturated  
1128 with recording artifacts. First, large voltage fluctuations were detected on a session by  
1129 session basis by concatenating signal epochs, z-score transforming the concatenated  
1130 signal, then assigning a standard deviation cut-off value for large voltage events for  
1131 mPFC, VMT, and hippocampal signals separately. These standard deviation cut-offs  
1132 were referenced back to a voltage value, and epochs were searched for fluctuating  
1133 voltage estimates exceeding this threshold. If epochs were saturated by >1% of extreme  
1134 voltage fluctuations, the epoch was removed. Epochs were also removed if the mPFC  
1135 or VMT voltages exceeded 3500mV in the positive or negative direction (tended to  
1136 fluctuate between -2000 to 2000 mV) in order to minimize the confound of movement  
1137 related artifacts on spike-phase comparisons. The cleaned high and low mPFC-  
1138 hippocampal theta coherence events were then concatenated to create LFP strings. To  
1139 ensure that spikes were not counted twice in entrainment analysis, the concatenated  
1140 signal was then filtered for uniquely occurring timestamps.

1141 Spike-phase values were estimated by transforming the filtered signal (4-12Hz  
1142 via third degree butterworth filtering) via Hilbert transform. Spike-phase values were  
1143 included if theta was twice the magnitude of delta. Only units with >50 spike-phase  
1144 estimations during both high and low coherence states were included (Siapas et al.,  
1145 2005; Jones and Wilson, 2005; Hyman et al., 2010; Hallock et al., 2016). Rayleigh’s test  
1146 of non-uniformity was performed and a corresponding p-value was assigned to each  
1147 neuron representing significant entrainment (*circ\_rtest.m*). The mean result length  
1148 vector (MRL) was calculated using 50 spikes, over 1000 random sampled spike  
1149 distributions, then taking the average MRL over the 1000 random samples.

1150 Spike field coherence analysis was used to measure spike-LFP coherence as a  
1151 function of frequency. Across linearly spaced frequencies (1:20Hz at 0.5Hz resolution),  
1152 complex morlet wavelets (6 cycles) were convolved against the LFP signals. Spike-LFP  
1153 phase angles were estimated using the analytic signal and calculating the length of the  
1154 average vector using Euler’s formula, defined as SFC (Cohen, 2017):

$$SFC_f = \left| \frac{\sum_{k=1}^N e^{\sqrt{-1} * \theta_k}}{N} \right|$$

1155 SFC was calculated over each frequency  $f$ , where  $\theta$  reflects the LFP phase angle per  
1156 neuron spike timestamp  $k$  through  $N$ .

## 1157 Behavioral quantification and recording

1158 Behavior was recorded from the rat using two approaches; 1) using a mounted  
1159 camera sampled at ~30 pixels/sec (Cheetah; Neuralynx) that detects LEDs on the  
1160 recording headstage and 2) by sending TTL pulses to Cheetah when infrared beams  
1161 were broken on the maze via MATLAB. Time spent to choice was estimated using TTL  
1162 pulses from the central door opening and from choice point exit (as defined by the  
1163 infrared beam controlling the closing of the choice point door behind the rat). Behavioral  
1164 complexity was calculated using the integrated change in absolute angular velocity  
1165 (IdPhi; code provided by D. Redish; Papale et al., 2012; Redish, 2016) using position  
1166 data obtained from central door opening to choice point exit. Position data was  
1167 smoothed using a gaussian weighted filter (*smoothdata.m*), then velocity in the x (dX)  
1168 and y (dY) dimensions are obtained using a discrete time-adaptive windowing approach  
1169 (Janabi-Sharifi et al., 2000). Phi is defined as the arctangent of dX and dY, and dPhi is  
1170 calculated by applying the time-adaptive windowing methodology on the unwrapped Phi  
1171 estimates. IdPhi is then defined as the integral over the |dPhi| scores. Thus, for each  
1172 trial, there is one IdPhi score that represents the overall head-movement complexity of  
1173 the rat. Distance traveled in delay was used to assess whether general mobility differed  
1174 between experimental and control groups. Position data was extracted from the 1.25s  
1175 interval before the choice point door opened (e.g. delay exit), and total distance traveled  
1176 was defined as the summation across instantaneous distance, calculated according to  
1177 the distance equation:

$$Distance\ Traveled = \sum_{i=1}^k \sqrt{(x_{i+1} - x_i)^2 + (y_{i+1} - y_i)^2}$$

1178 Where  $i$  refers to each video tracking data point through point  $k$ , and x/y refer to  
1179 cartesian coordinates obtained through video tracking. Distance traveled was then  
1180 normalized across each session to be between 0 and 1, then sorted according to trial-  
1181 type.

## 1182 Optogenetics

1183 A Doric laser was programmed with the Neuroscience studio software to pulse  
1184 blue (450nm) or red (638nm) lights in a square wave pattern. To test if VMT stimulation  
1185 could enhance theta synchrony, a variety of stimulation parameters were tested. For  
1186 theta stimulation, 6-8Hz frequencies were tested under various conditions. Laser power  
1187 was tested prior to stimulation and red/blue lasers were matched in terms of mW output.  
1188 Laser powers varied from 1-20mW. Quiescent states were detected by calculating a  
1189 ratio between theta and delta LFP power in the hippocampus. Theta:delta ratio values <

1190 1 was defined as a candidate quiescent state. Coherence thresholds were also used for  
1191 the stimulation of the VMT. During awake states, stimulation occurred if theta coherence  
1192 was greater than the high coherence threshold but less than the low coherence  
1193 threshold. The data shown in **Fig. 6** represent single sessions recorded across animals  
1194 similarly, with 80-100 red and blue laser stimulation events. The data shown in  
1195 **Extended Fig. 9** show various parameter states and their effect on coherence when  
1196 paired with VMT stimulation across recording sessions. A stimulation event typically  
1197 lasted 1.5-2s and then the laser was turned off for 2-6sec. Stimulating the VMT of rat #2  
1198 revealed mixed results and sometimes visual observations failed to reveal clear theta in  
1199 the mPFC, despite clear power increases. Rat #2 received a single anterior-posterior  
1200 injection of AAV5-hSyn-ChR2-eYFP (see Surgery above).

## 1201 Statistics

1202 Each figure panel was considered an independent analysis, and when significant  
1203 p-values were observed (e.g.  $p < 0.05$ ), they were corrected for multiple comparisons  
1204 using Bonferroni's method (original p-value multiplied by the number of tests performed)  
1205 or in some cases using the Benjamini Hochberg method for many comparisons (**Fig.**  
1206 **3H; Fig. 6; Extended Fig. 9**; code: *fdr\_bh.m* by David Groppe). If significance was not  
1207 observed, the raw p-value was reported. Details regarding statistical testing were  
1208 reported in the figure captions with information regarding p-value adjustment.  
1209 Normalized difference scores were defined as such:

$$NormDiff = \frac{X - Y}{X + Y}$$

1210 Where X and Y refer to within subject datasets. Normalized difference scores were  
1211 tested for significance via t-test against a 0-null. Statistical testing was performed in  
1212 MATLAB and Rstudio.

1213

1214

1215

1216

1217

1218

1219

1220

1221

## 1222 EXTENDED FIGURES

1223

1224

1225

1226

1227

1228

1229

1230

1231

1232

1233

1234

1235

1236

1237

1238

1239

1240

1241

1242

1243

1244

1245

1246

1247

1248



1249 EXTENDED FIGURE 1

1250

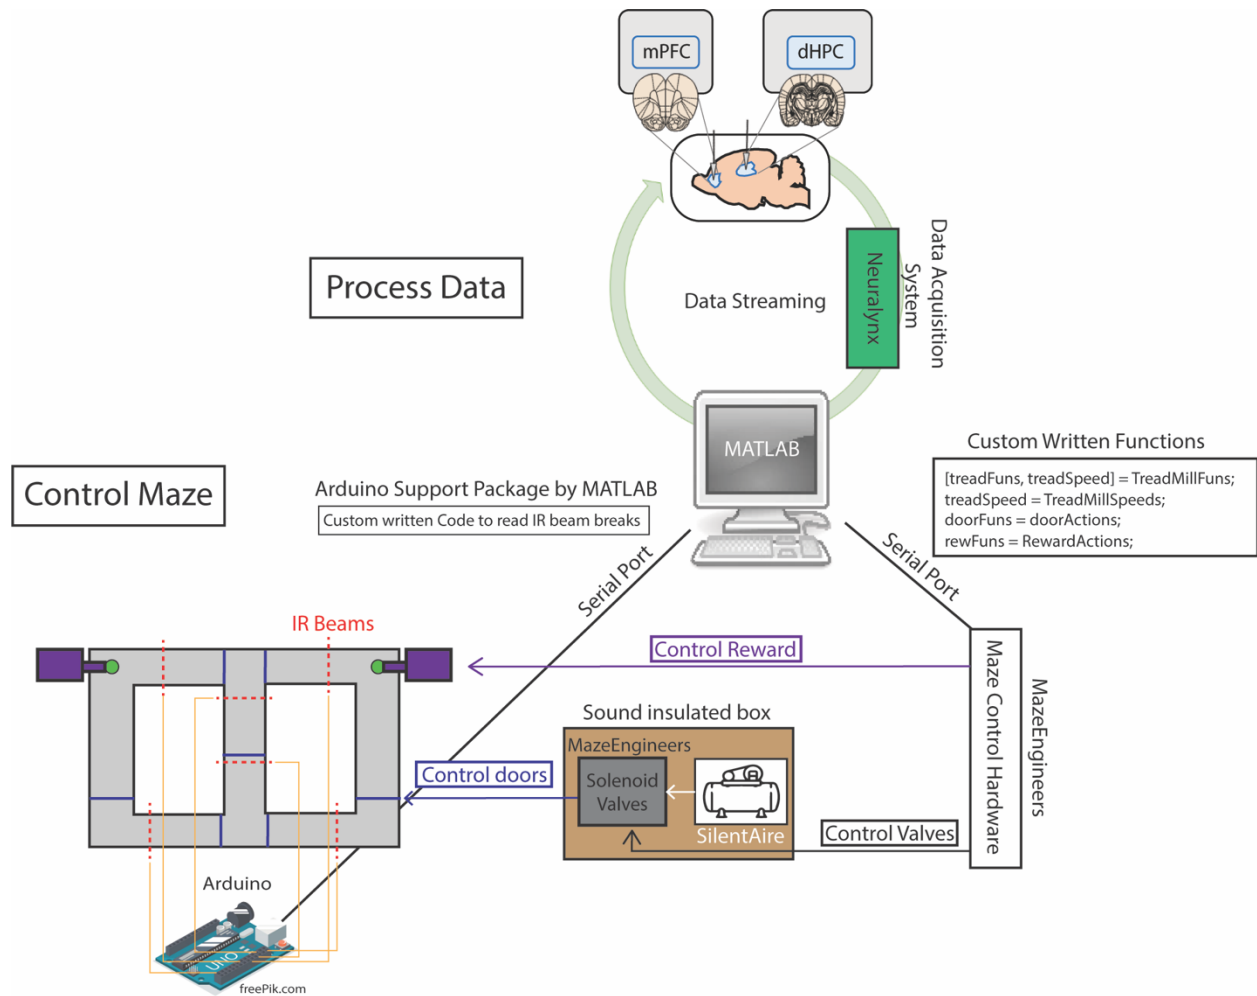

1251

1252 **Extended Figure 1 | Two independent loops support brain machine interfacing.**

1253 Schematic demonstration of how neural data could be processed in between control of  
1254 the automatic T-maze. In terms of maze control, serial ports were formed between  
1255 hardware built from MazeEngineers and an Arduino Uno board. Custom written  
1256 functions were used to control solenoid valves, which pushed or released air, mediated  
1257 by a silent air compressor. The solenoid valves and air compressor were placed in a  
1258 large wooden box, with foam insulation walls, in order to reduce noise. The  
1259 MazeEngineers hardware was also programmed to control the release of chocolate  
1260 pellets for reward delivery. Using Arduino-powered infrared beam breaks (yellow lines  
1261 denote connections), MATLAB could detect the exact location of the rat in order to carry  
1262 out the programmed sequence of the task. For example, as rats approached a reward  
1263 zone, an infrared beam break triggered the closing of a door (blue lines on maze) and  
1264 the release of a reward (if a choice was correct).

1265

1266

1267 **EXTENDED FIGURE 2**

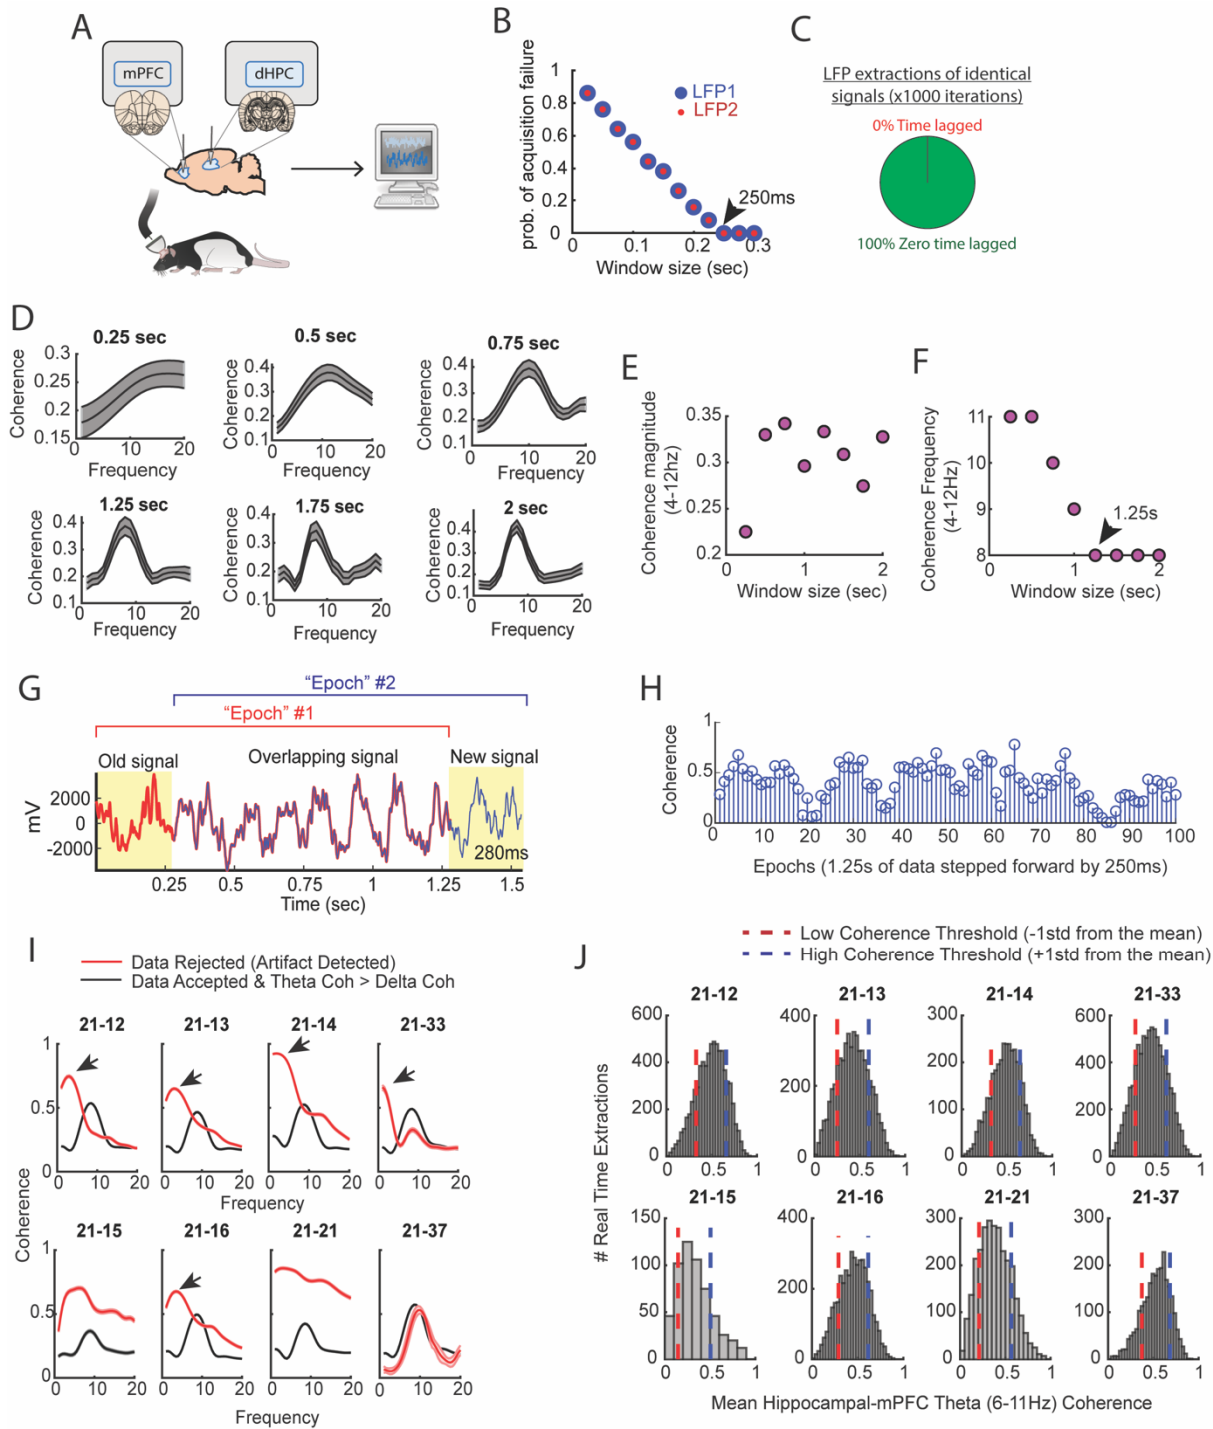

1268

1269 **Extended Figure 2 | Brain machine interface parameterization. A)** Cartoon  
 1270 schematic showing that signals were collected from the mPFC and hippocampus, then  
 1271 sent to a computer for processing in real-time. **B)** Two LFP signals were collected in  
 1272 real-time at various intervals, with an interval being defined as the time-lag in between  
 1273 attempted streaming from the acquisition system recording the neural data and the

1274 computer processing the data. Each data point represents an average from 50  
1275 attempted streaming events. Notice the negative relationship between the probability of  
1276 streaming failure and the amount of data streamed. If our program waited 250ms in  
1277 between streaming attempts, we found a 0 probability of acquisition failure. In practice,  
1278 even at this interval, there were still rare acquisition failures that could be accounted for  
1279 via programming. **C)** Two identical signals were programmed as two different recording  
1280 channels in the DigitalLynx SX data acquisition system to test if serial streaming of two  
1281 signals induced time-lags (e.g. one signal being temporally shifted in time relative to the  
1282 other signal). We found that all serial streaming events were identical, indicating a zero  
1283 time lag in between extracting two signals in real-time. **D)** Visual representation of the  
1284 analyses shown in **(E and F)**. Notice that the shape of the coherence distributions vary  
1285 as a function of the amount of data analyzed, but are generally consistent when  
1286 analyzing at least 1.25s worth of data. **E)** Averaged coherence magnitude (4-12Hz) as a  
1287 function of data size. Notice that at 250ms, coherence magnitude was highly  
1288 underestimated. **F)** Coherence frequency (the frequency corresponding to the strongest  
1289 coherence values) was modulated by the amount of data analyzed. Notice the  
1290 coherence frequency to taper at 8Hz when analyzing at least 1.25s worth of data. **G)** A  
1291 coherence “epoch” was defined as a 1.25s window, with each epoch varying by 250ms  
1292 in time. The red colored signal was acquired first, the blue colored signal was acquired  
1293 after 250ms, and the two signals were overlaid for visualization purposes. **H)** Stem plot  
1294 showing theta coherence epochs as a function of time. Notice the rather smooth  
1295 transitions between stronger and weaker theta coherence values, consistent with a  
1296 moving window approach sharing a large proportion of data **(G)**. **I)** Real-time artifact  
1297 rejection procedures contained strong delta coherence across all rats (red curves).  
1298 When these artifact rejection procedures were combined with rejection of signals if delta  
1299 coherence was stronger than theta coherence, highly consistent coherence distributions  
1300 emerged (black curves). **J)** By performing these methods in real-time and gathering  
1301 hundreds-to-thousands of theta coherence values (6-11Hz), coherence distributions  
1302 were generated via offline data analysis. “High” and “low” magnitude theta coherence  
1303 thresholds were then defined as +1std and -1std from the mean theta coherence value,  
1304 respectively.

1305

1306

1307

1308

1309

1310

1311

1312

1313 EXTENDED FIGURE 3

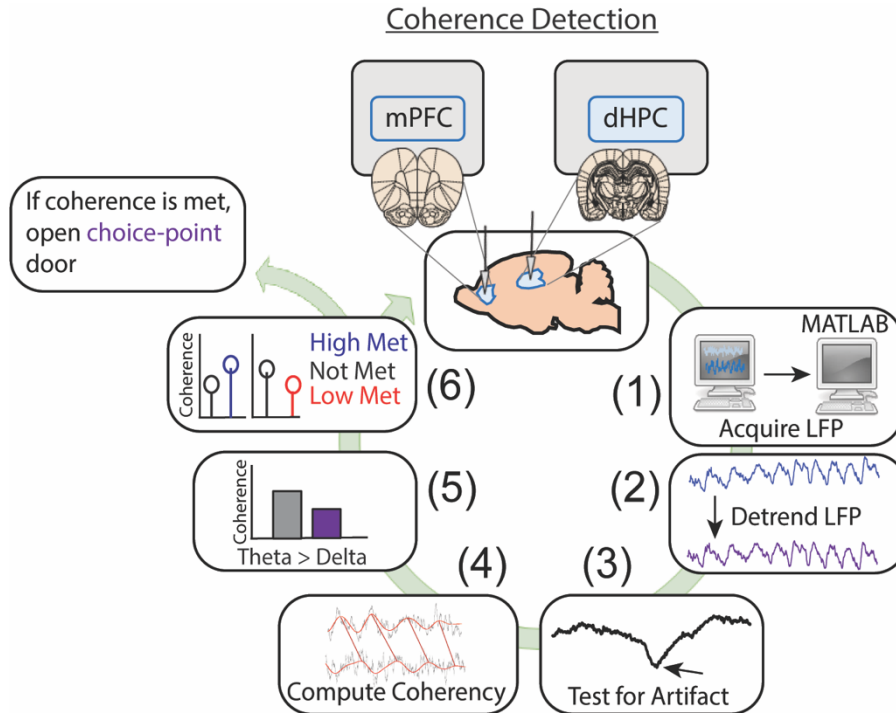

1314

1315 **Extended Figure 3 | Detailed representation of brain machine interfacing.** Data  
1316 were acquired in real-time, then processed in MATLAB. Data processing consisted of  
1317 fitting and removing a third degree polynomial to detrend the signals (1.25s worth of  
1318 data), then signals were tested for artifacts. These artifacts were defined as large  
1319 voltage fluctuations exceeding 4std of a mean and standard deviation generated from  
1320 10 minute baseline recordings (as rats occupied a flower pot with motion being more  
1321 restricted than when on the maze). In real-time, if voltage fluctuations exceeded 4std  
1322 and these events saturated >1% of the signal, then the brain machine interfacing  
1323 restarted. If no artifacts were detected, coherence was calculated in 0.5Hz steps from 1-  
1324 20Hz using *miscohere* and only if delta coherence (1-4Hz) exceeded theta coherence  
1325 (6-11Hz), then brain machine interfacing restarted. If on a high coherence trial, theta  
1326 coherence exceeded delta coherence, and theta coherence was higher than the  
1327 predetermined threshold, a door was opened, releasing the rat from being sequestered  
1328 in the delay zone that separated trials. Upon release, rats could make a choice.  
1329 Similarly, on low coherence trials, if the criterion described above was met and theta  
1330 coherence was lower than the predetermined threshold, then the trial was initiated. If  
1331 coherence was not met, the brain machine interface restarted.

1332

1333

1334 EXTENDED FIGURE 4

1335

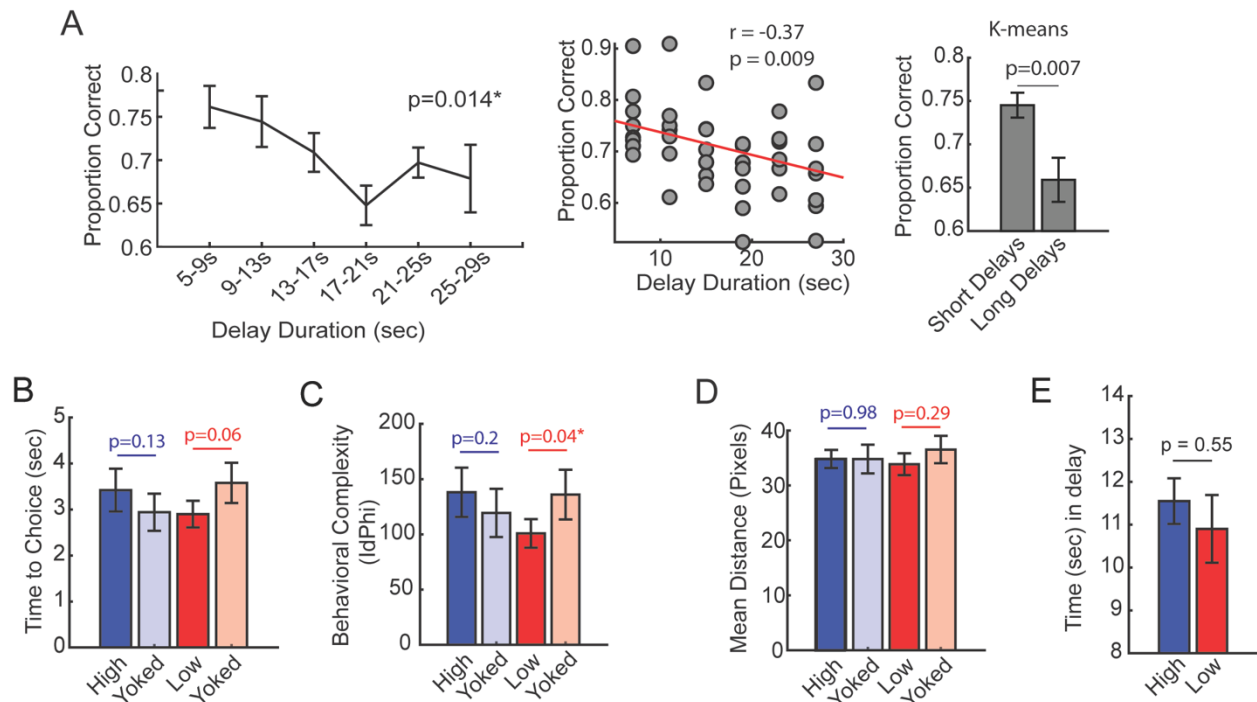

1336

1337 **Extended Figure 4 | Follow-up behavioral analyses from the delayed alternation**  
 1338 **brain machine interfacing experiment. A) Left panel**, during task training, time-spent  
 1339 in the delay zone was binned and the average proportion correct (# correct trials/ #  
 1340 trials) was calculated. There was a significant effect of delay duration on future choice  
 1341 outcomes ( $F(5,35) = 3.38$ ; Repeated Measures ANOVA;  $N = 8$  rats, 4 male, 4 female).  
 1342 **Middle panel**, same data from left panel, but represented as a scatter plot for  
 1343 correlation analysis. **Right panel**, k-means clustering was used to algorithmically define  
 1344 short and long delay durations. Short delays were defined as the minimum possible  
 1345 delay length (5s) to the minimum centroid (10.34s). Long delays were defined as the  
 1346 maximum centroid (23.58s) to the maximum possible delay length (30s). There was a  
 1347 greater proportion of correct choices following short delays relative to long delays ( $t(7) =$   
 1348  $3.7$ ,  $p = 0.007$ ,  $ci = [3.15, 14.1]$ ). These analyses validate the delayed alternation task  
 1349 as a working memory dependent task. **B)** Time to choice was calculated as the amount  
 1350 of time spent from trial initiation to choice exit (infrared beam break that triggers the  
 1351 reward release). There was no statistical difference between high and yoked trials,  
 1352 although there was a trending difference between low and yoked trials ( $t(7) = -2.23$ ,  $ci =$   
 1353  $[-1.4, 0.04]$ ). **C)** Behavioral complexity (or head-movement complexity) was measured  
 1354 via the integrative change in absolute angular velocity (ldPhi; Redish, 2016), a common  
 1355 metric to extract vicarious trial and error. Low coherence trials showed significantly  
 1356 lower ldPhi relative to yoked trials ( $t(7) = -2.5$ ,  $ci = [-68.36, -1.9]$ ). **D)** Distance (in pixels)  
 1357 was calculated in the last 1.25s before trial initiation, as these times were used to trigger



1358 trials according to theta coherence magnitude. There were no differences in distance  
1359 traveled between coherence and yoked trials. **E)** The amount of time spent in the delay  
1360 zone is a proxy of the amount of time it took to reach theta coherence thresholds. There  
1361 was no significant difference in delay zone time-spent between high and low coherence  
1362 trials. Planned comparisons between coherence and yoked trials were performed via  
1363 paired t-tests. \* $p < 0.05$ . P-values were shown in figure and the statistics were reported in  
1364 the figure caption of  $p < 0.05$ .

1365

1366

1367

1368

1369

1370

1371

1372

1373

1374

1375

1376

1377

1378

1379

1380

1381

1382

1383

1384

1385

1386

1387

1388 EXTENDED FIGURE 5

1389

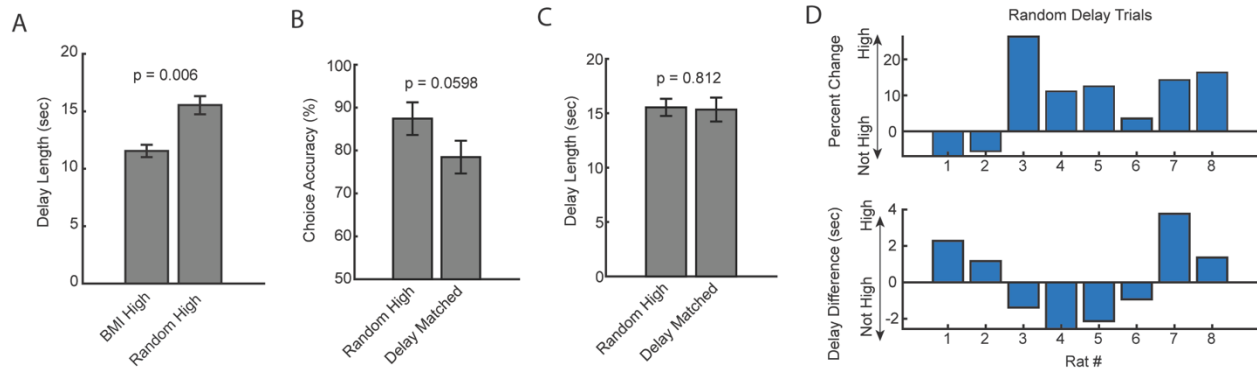

1390

1391 **Extended Fig. 5 | Analysis of random delay trial onset with coincident strong**  
1392 **mPFC-hippocampal theta coherence. A)** Delay duration on brain machine interfacing  
1393 trials was significantly shorter when compared to the delay duration on random delay  
1394 trials with coincident strong mPFC-hippocampal theta coherence ( $t(7) = -3.8$ ,  $ci = -6.4$  to  
1395  $-1.6$ ,  $p = 0.006$ ; paired t-test). **B)** There was not a significant difference between random  
1396 trials that co-occurred with strong mPFC-hippocampal theta coherence when compared  
1397 to a distribution of trials with the same delay durations ( $t(7) = 2.4$ ,  $ci = [-0.0048$  to  $0.184]$ ,  
1398  $p = 0.0598$ ). **C)** Estimation of “delay matched” trials in **(B)** was obtained by finding trials  
1399 with identical delay durations. Unlike the brain machine interfacing experiment, these  
1400 delays were distributed across the session and contribute unequally to the dataset (i.e.  
1401 a high theta coherence trial in the brain machine interfacing experiment had exactly one  
1402 yoked control trial in a 10-trial block). There was no difference in the delay length for  
1403 random high coherence trials and random trials with identical delay durations ( $t(7) =$   
1404  $0.25$ ,  $ci = -1.7$  to  $2.1$ ,  $p = 0.81$ ). **D) Top panel:** Distribution of percent change on the  
1405 delayed alternation task on random delay trials across rats. Positive values indicate that  
1406 rats performed better on a random delay trial if it was temporally coincident with strong  
1407 mPFC-hippocampal theta coherence. **Bottom panel:** Difference in delay duration as a  
1408 function of rat number. Data are represented as the mean  $\pm$  sem. Statistical test  
1409 performed was the paired t-test and corresponding p-values are shown above the  
1410 figure.

1411

1412

1413

1414

1415

1416

1417 EXTENDED FIGURE 6

1418

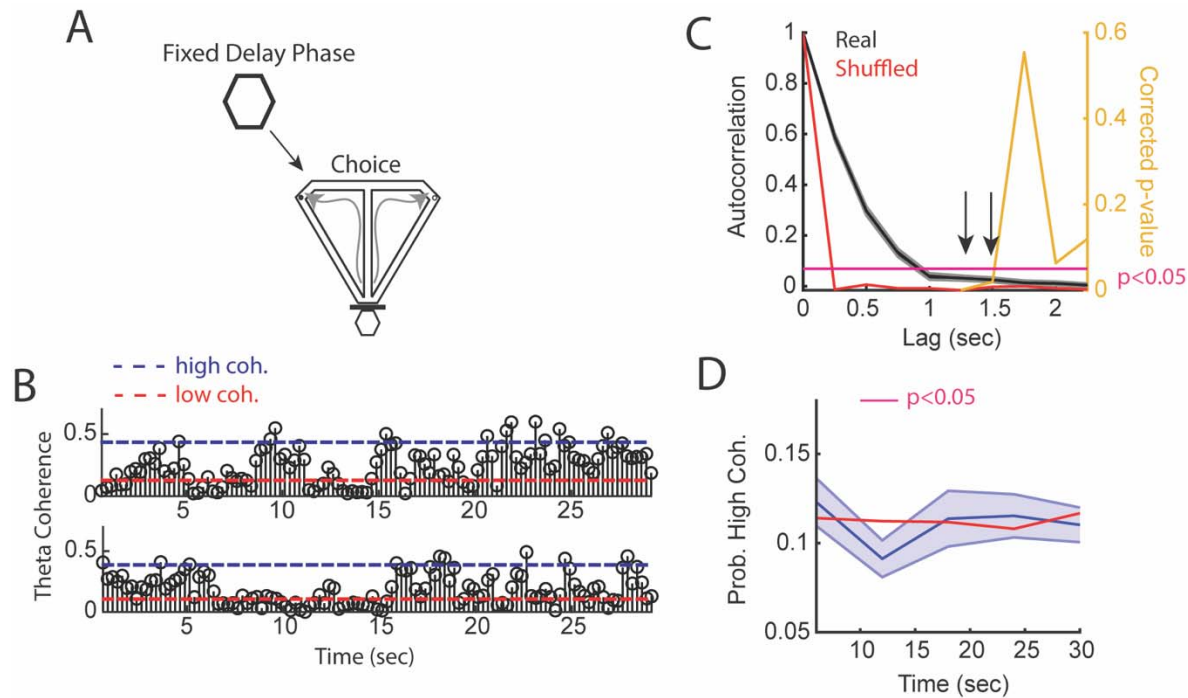

1419

1420 **Extended Figure 6 | mPFC-hippocampal theta coherence across a fixed delay. A)**

1421 Task schematic showing that in between delayed alternation choices, rats waited for a

1422 fixed and predictable, 30s delay duration. **B)** Two trials showing mPFC-hippocampal

1423 theta coherence as a function of time in the delay. Dashed blue line represents high

1424 coherence threshold, while the dashed red line denotes low coherence threshold. **C)**

1425 Sample autocorrelation function of mPFC-hippocampal theta coherence (black line).

1426 Data are represented as the mean  $\pm$  s.e.m. Red line denotes the session average

1427 calculated from shuffling the distribution of theta coherence values over the delay. Right

1428 y-axis shows Bonferroni corrected p-value of a one-sample t-test against the shuffled

1429 autocorrelation mean. Arrows point to significant correlations to lags not sharing data

1430 (coherence epochs were 1.25s with 250ms overlap). **D)** High mPFC-hippocampal theta

1431 coherence events did not increase in frequency towards trial onset (30s) relative to

1432 shuffled theta coherence distributions (red solid line). There was a significant reduction

1433 in mPFC-hippocampal theta coherence between 10 and 15s, as denoted by a magenta

1434 bar in the figure ( $t(21) = 2.9$ ,  $p = 0.046$ , Bonferroni Corrected for 4 comparisons; one-

1435 sample t-test against the shuffled session average).

1436

1437

1438

1439 EXTENDED FIGURE 7

1440

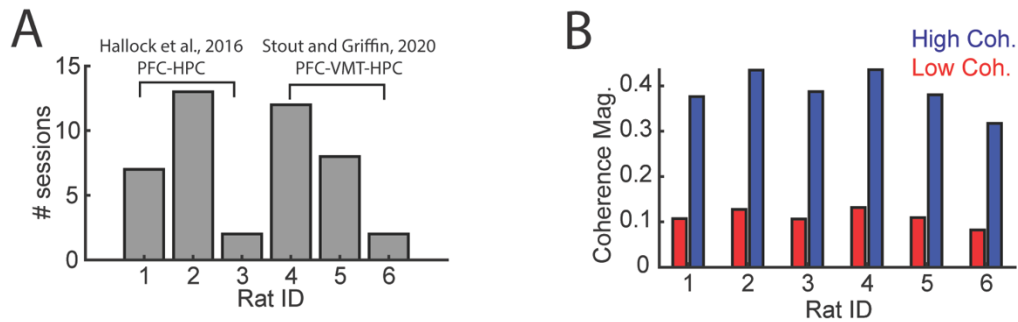

1441

1442 **Extended Figure 7 | Details regarding mPFC-VMT-HPC recordings.** Data from **(A**  
1443 **and B)** were used for analyses of LFP-LFP synchrony in **Figs 5 and Extended Fig. 6)**  
1444 Data from six rats were analyzed, three from Hallock et al., 2016 with simultaneous  
1445 mPFC and hippocampal recordings and three from Stout and Griffin, 2020. **B)** High and  
1446 low coherence thresholds were determined for each rat. Notice that thresholds were  
1447 rather consistent across rats.

1448

1449

1450

1451

1452

1453

1454

1455

1456

1457

1458

1459

1460

1461

1462

1463 EXTENDED FIGURE 8

1464

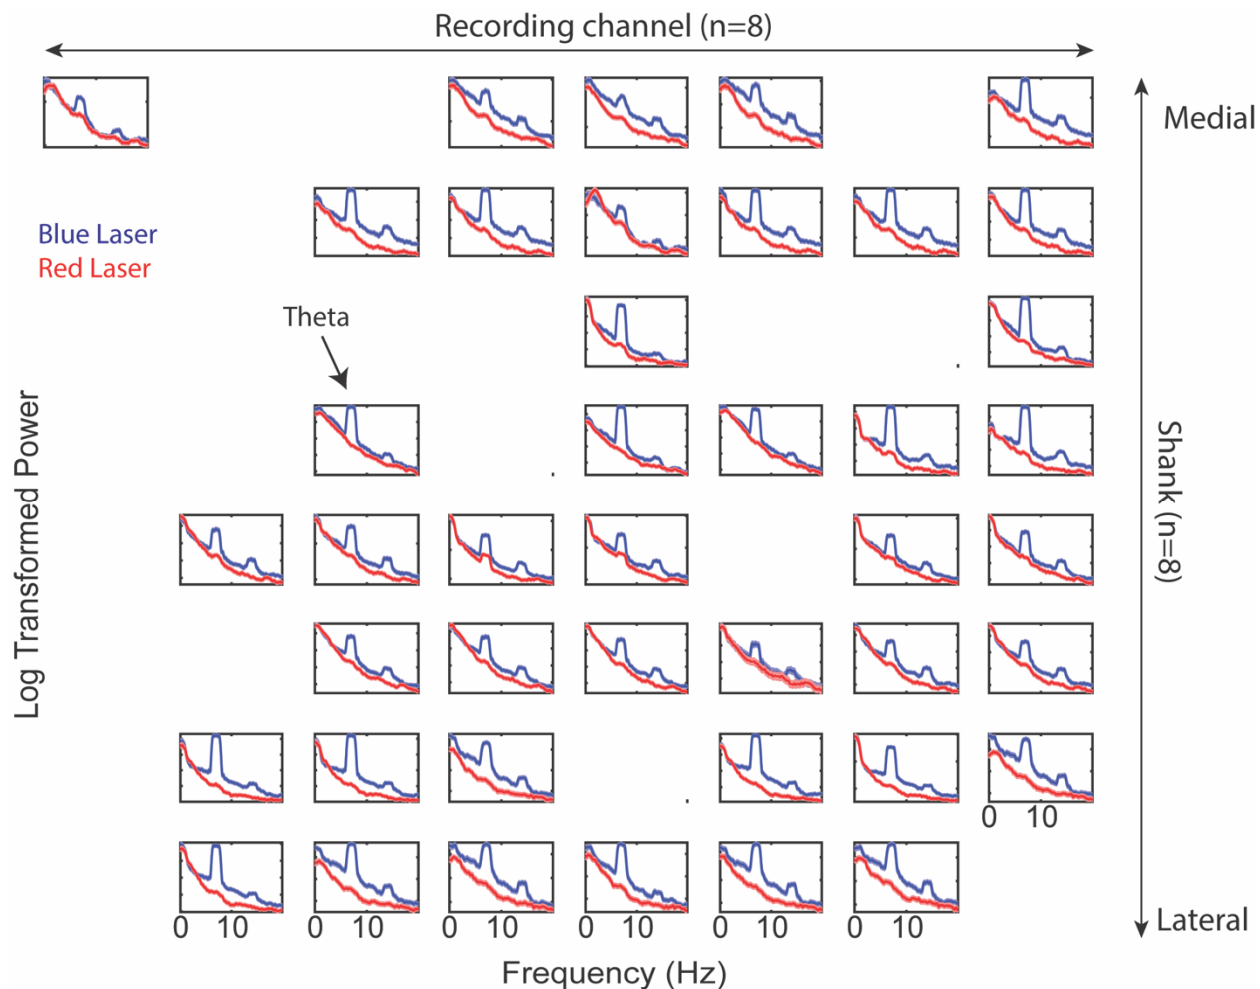

1465

1466 **Extended Figure 8 | Prefrontal power spectra across recording shanks and**  
1467 **channels during ventral midline thalamus stimulation. Companion figure to Fig.**  
1468 **6C.** Log-transformed power as a function of frequency. Blue lines represents power  
1469 spectral density estimates from mPFC signals recorded during ventral midline thalamus  
1470 stimulation. Red lines represent power spectral density estimates from mPFC signals  
1471 recorded during control (red laser) stimulation. Figure columns represent recording  
1472 channels per shank, while rows represent shank number from the corresponding  
1473 medial-lateral placement in the mPFC (see **Fig. 6A-C**).

1474

1475

1476

1477



1478 EXTENDED FIGURE 9

1479

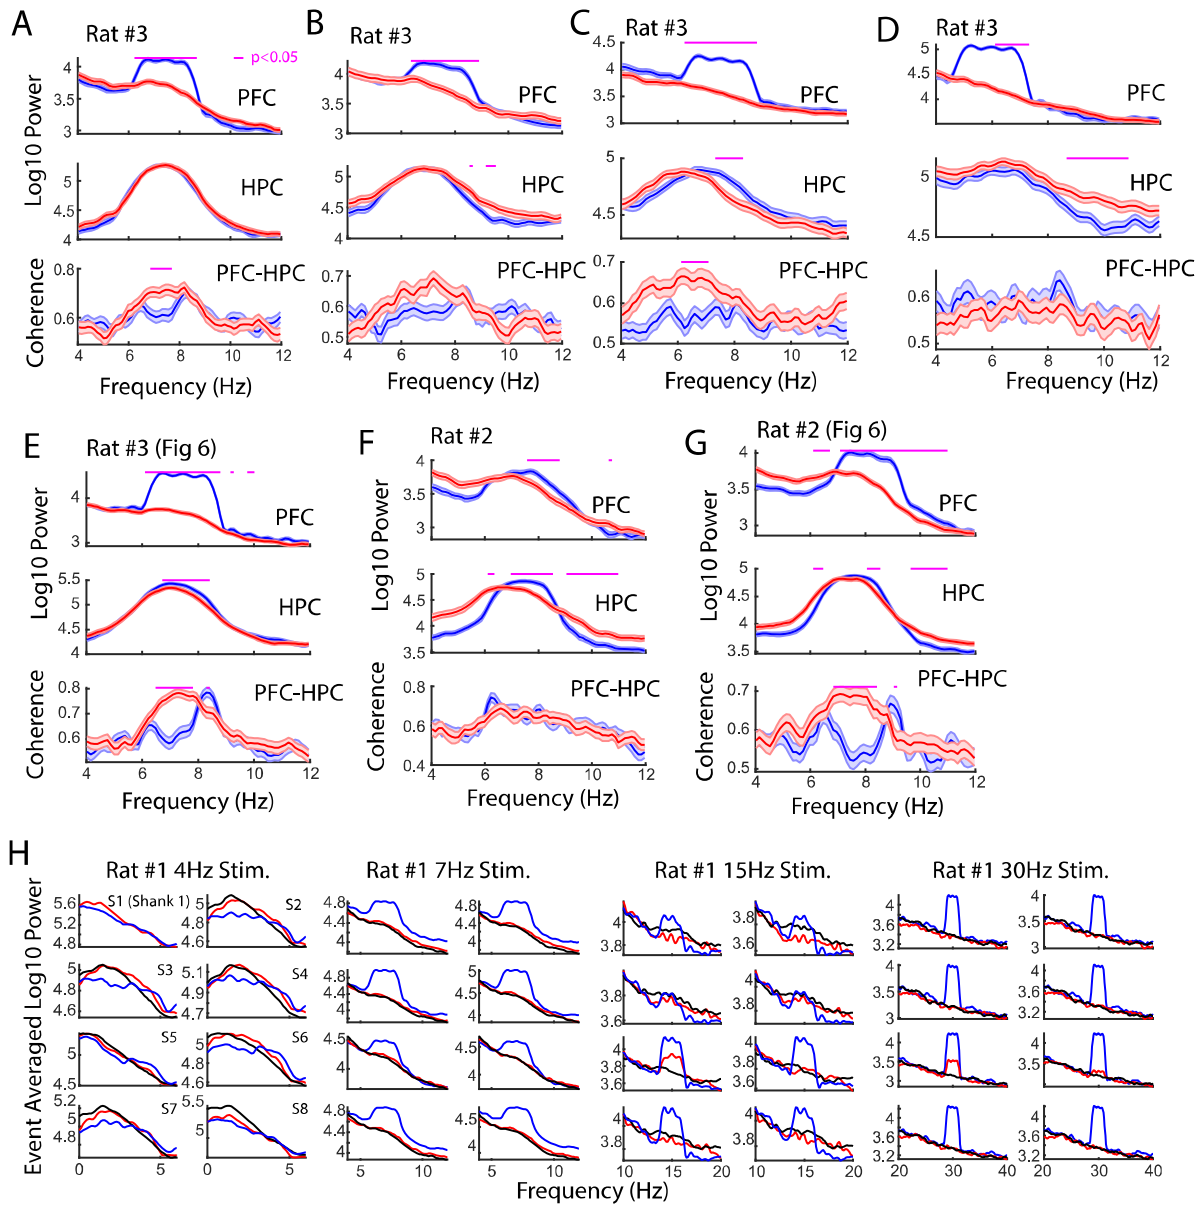

1480

1481

1482 **Extended Fig. 9 | Sessions recorded with VMT stimulation. A)** Stimulation of the  
1483 VMT occurred when hippocampal theta power was greater than hippocampal delta  
1484 power, when theta coherence was neither above a high coherence threshold nor below  
1485 a low coherence threshold, and using a phase-lag of  $-1$  phase/ $\pi$  based on visualization  
1486 of the phase-lag spectrum (N = 57 red, 57 blue laser stimulation events; 1mW power).  
1487 **B)** Like in **(A)**, laser onset was timed according to a theta delta ratio and theta  
1488 coherence magnitude, but this occurred as the animal explored a maze (N = 91 blue, 78  
1489 red laser stimulation events; 1mW power). **C)** Laser onset was timed to epochs when  
1490 theta power in the hippocampus was less than delta power in the hippocampus (N =  
1491 114 red, 131 blue laser stimulation events; 1mW power). **D)** The VMT was stimulated at  
1492 6Hz when hippocampal theta power was less than delta power (N = 104 red, 93 blue  
1493 laser events). **E)** Same data as shown in **Fig. 6**. VMT stimulation was timed around  
1494 hippocampal theta power exceeding hippocampal delta power, and mPFC-hippocampal  
1495 theta coherence magnitude falling in between high and low coherence thresholds (113  
1496 blue, 101 red laser events; 4.5mW power). **F)** Rat #2 received 7Hz stimulation randomly  
1497 (N = 57 red, 57 blue laser stimulation events; 17mW power). **G)** As shown in **Fig. 6**, rat  
1498 #2 also received a session with 8Hz VMT stimulation timed to epochs when 8Hz theta  
1499 power was the strongest frequency across 1-50Hz (104 red, 108 blue laser stimulation  
1500 events). Data are represented as the mean  $\pm$  s.e.m. Benjamini Hochberg corrected p-  
1501 values are represented in magenta, tested over 6-11Hz with two-sample t-tests. **H)** The  
1502 VMT of rat #3 was stimulated across various frequency ranges to understand the effect  
1503 of VMT theta on the enhancement of prefrontal oscillation power. Each sub-panel  
1504 represents a power spectrum calculated over the averaged LFP from 1/8 shanks on a  
1505 64ch silicon probe. Blue colors indicate blue laser stimulation, red indicates red laser  
1506 stimulation, black indicates data after stimulation end. VMT stimulation increased mean  
1507 power when stimulated at 7Hz (N = 83 blue, 88 red laser events), 15Hz (N = 44 blue, 42  
1508 red laser events), and 30Hz (N = 34 blue, 52 red laser events), but altered the shape of  
1509 the power spectrum at 4Hz (N = 39 blue, 47 red laser events). Red laser stimulation  
1510 increased mean 15Hz and 30Hz power on Shank #5 (S5). Data are represented as the  
1511 mean.

1512

1513

1514

1515

1516

1517

1518

1519 **EXTENDED TABLE 1**

1520 **Extended Table 1** | Statistics from the delayed alternation brain machine interfacing  
1521 experiment from **Fig. 2**.

| <i>Test</i>  | <i>X</i> | <i>Y</i> | <i>T-stat</i> | <i>df</i> | <i>Conf. Interval</i> | <i>p-val</i> | <i># corrections</i> |
|--------------|----------|----------|---------------|-----------|-----------------------|--------------|----------------------|
| <i>ttest</i> | High     | Y.High   | 2.8           | 7         | [2.62, 28.3]          | 0.02         | 0                    |
| <i>ttest</i> | Low      | Y.Low    | -0.3          | 7         | [-16.5, 13.2]         | 0.80         | 0                    |
| <i>ttest</i> | High     | Rand     | 6.1           | 7         | [10.4, 23.4]          | 0.002        | 3                    |
| <i>ttest</i> | Y.High   | Rand     | 0.32          | 7         | [-9.2, 12.1]          | 0.76         | 0                    |
| <i>ttest</i> | Low      | Rand     | 0.8           | 7         | [-7.6, 15.6]          | 0.44         | 0                    |
| <i>ttest</i> | Y.Low    | Rand     | 1.3           | 7         | [-4.7, 16.0]          | 0.24         | 0                    |

1522 *N = 8 rats. Bonferroni's method was used to correct p-values for multiple comparisons if*  
1523 *a significant effect was observed. The experiment was designed to compare coherence*  
1524 *trials to yoked control trials and as such, these comparisons were planned.*

1525

1526 **EXTENDED TABLE 2**

1527 **Extended Table 2** | Statistics from Fig. 3H showing change in mPFC-hippocampal  
1528 theta coherence difference scores (high coherence – low coherence trials) as rats  
1529 navigated towards and away from the choice-point infrared beam.

1530

| <i>Time from choice (seconds)</i> | <i>t-stat</i> | <i>p-value</i> | <i>FDR p-value</i> |
|-----------------------------------|---------------|----------------|--------------------|
| -1.86                             | 3.71          | 0.01           | 0.04               |
| -1.57                             | 2.83          | 0.03           | 0.06               |
| -1.29                             | 1.92          | 0.10           | 0.12               |
| -1.00                             | 0.27          | 0.79           | 0.79               |
| -0.71                             | 0.58          | 0.58           | 0.66               |
| -0.43                             | 3.46          | 0.01           | 0.04               |
| -0.14                             | 2.45          | 0.04           | 0.07               |
| 0.14                              | 2.41          | 0.05           | 0.07               |
| 0.43                              | 3.23          | 0.01           | 0.04               |

1531 *N = 8 rats. FDR correction achieved with Benjamini Hochbergs method.*

1532

1533

1534

1535 **EXTENDED TABLE 3**

1536 **Extended Table 3 | Statistics from Fig. 5 power analysis**

1537

| Test  | X   | Y | T-stat | df | Conf. Interval | p-val  | # corrections |
|-------|-----|---|--------|----|----------------|--------|---------------|
| ttest | PF  | 0 | 14.7   | 21 | [0.025, 0.033] | <0.001 | 3             |
| ttest | VMT | 0 | 5.02   | 21 | [0.009, 0.02]  | <0.001 | 3             |
| ttest | HC  | 0 | 9.6    | 21 | [0.008, 0.01]  | <0.001 | 3             |

1538 *N = 22 sessions distributed across 3 rats. p-values were corrected via Bonferroni's*  
1539 *method when significance was reported. T-tests were performed against a null of 0 or*  
1540 *against a paired dataset. PF = mPFC, VMT = Ventral midline thalamus, HC =*  
1541 *Hippocampus.*

1542

1543 **EXTENDED TABLE 4**

1544

1545 **Extended Table 4 | Statistics from Fig. 5 coherence analysis**

1546

| Test  | X      | Y      | T-stat | df | Conf. Interval | p-val  | # corrections |
|-------|--------|--------|--------|----|----------------|--------|---------------|
| ttest | PF-VMT | 0      | 9.2    | 21 | [0.28, 0.44]   | <0.001 | 3             |
| ttest | VMT-HC | 0      | 5.2    | 21 | [0.06, 0.14]   | <0.001 | 3             |
| ttest | PF-VMT | VMT-HC | 5.6    | 21 | [0.17, 0.37]   | <0.001 | 3             |

1547 *N = 22 sessions distributed across 3 rats. p-values were corrected via Bonferroni's*  
1548 *method when significance was reported. T-tests were performed against a null of 0 or*  
1549 *against a paired dataset. PF = mPFC, VMT = Ventral midline thalamus, HC =*  
1550 *Hippocampus.*

1551

1552

1553

1554

1555

1556

1557

1558

1559

1560

1561

1562

1563

1564



1565 EXTENDED TABLE 5

1566 **Extended Table 5 | Multivariate granger prediction results (Fig. 5).**

1567

| Test  | X      | Y      | Tstat | df | Conf. Interval | p-val  | # corrections |
|-------|--------|--------|-------|----|----------------|--------|---------------|
| ttest | HC2VMT | 0      | 2.06  | 21 | [-0.00, 0.12]  | 0.05   | 0             |
| ttest | VMT2HC | 0      | 0.32  | 21 | [-0.05, 0.06]  | 0.76   | 0             |
| ttest | HC2VMT | VMT2HC | 1.26  | 21 | [-0.03, 0.13]  | 0.22   | 0             |
| ttest | PF2VMT | 0      | 7.46  | 21 | [0.13, 0.22]   | 0.00** | 3             |
| ttest | VMT2PF | 0      | 2.87  | 21 | [0.02, 0.11]   | 0.03*  | 3             |
| ttest | PF2VMT | VMT2PF | -3.66 | 21 | [-0.17, -0.05] | 0.00** | 3             |
| ttest | PF2HC  | 0      | 7.56  | 21 | [0.21, 0.36]   | 0.00** | 3             |
| ttest | HC2PF  | 0      | 7.58  | 21 | [0.25, 0.43]   | 0.00** | 3             |
| ttest | PF2HC  | HC2PF  | 1.01  | 21 | [-0.17, 0.06]  | 0.33   | 0             |

1568 *N = 22 sessions distributed across 3 rats. p-values were corrected via Bonferroni's*  
1569 *method when significance was reported. \*p<0.05. \*\*p<0.01. T-tests were performed*  
1570 *against a null of 0 or against a paired dataset. PF = mPFC, VMT = Ventral midline*  
1571 *thalamus, HP = Hippocampus.*

1572
